# Supplementary material for: Proactive vaccination using multiviral Quartet Nanocages to elicit broad anti-coronavirus responses
Source: PubMed Central journal article supplement (PMC11329374; doi:10.1038/s41565-024-01655-9), 2024-05-06
Supplement: 41565_2024_1655_MOESM1_ESM.pdf [file 41565_2024_1655_MOESM1_ESM.pdf]

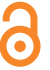

---

# Proactive vaccination using multiviral Quartet Nanocages to elicit broad anti-coronavirus responses

---

In the format provided by the authors and unedited

---

|                |                                                                                                               |     |     |     |     |
|----------------|---------------------------------------------------------------------------------------------------------------|-----|-----|-----|-----|
|                | 320                                                                                                           | 340 | 360 | 380 | 400 |
| <b>Rs4081</b>  | RVSPTHEVVRFPNITNRCPFDKVFNASRFPNVYAWERTKISDCVADYTVLYNS-TSFSTFKCYGVSPSKLIIDLCLFSTSVYADTFLL                      |     |     |     |     |
| <b>RmYN02</b>  | RILPSTEVVRFNITNFCPFDKVFNATRFPNVYAWQRTKISDCIADYTVLYNS-TSFSTFKCYGVSPSKLIIDLCLFSTSVYADTFLL                       |     |     |     |     |
| <b>Rf1</b>     | RVSPVTEVVRFPNITNLCPFDKVFNATRFPSVYAWERTKISDCVADYTVFYNS-TSFSTFNFCYGVSPSKLIIDLCLFSTSVYADTFLL                     |     |     |     |     |
| <b>BM-4831</b> | RVTPTEVVRFPNITQLCPFNEVFNITSFSPSVYAWERMRTNRCVADYSVLYNSSASFSTFQCYGVSPTKLNLDLFCSSVYADYFV                         |     |     |     |     |
| <b>BtKY72</b>  | RVSPSTEVVRFNITNLCPFQGVFNASNFPSVYAWERLRISDCVADYAVLYNSSSFSTFKCYGVSPTKLNLDLFCSSVYADYFV                           |     |     |     |     |
| <b>pang17</b>  | RVQPTISIVRFPNITNLCPFGEVFNASKFASVYAWNRKRISNCVADYSVLYNS-TSFSTFKCYGVSPTKLNLDLFCFTNVYADSFV                        |     |     |     |     |
| <b>SARS2</b>   | RVQPTESIVRFPNITNLCPFGEVFNATRFASVYAWNRKRISNCVADYSVLYNS-ASFSTFKCYGVSPTKLNLDLFCFTNVYADSFV                        |     |     |     |     |
| <b>RaTG13</b>  | RVQPTDSIVRFPNITNLCPFGEVFNATTFASVYAWNRKRISNCVADYSVLYNS-TSFSTFKCYGVSPTKLNLDLFCFTNVYADSFV                        |     |     |     |     |
| <b>SHC014</b>  | RVAPSKEVVRFPNITNLCPFGEVFNATTFPSVYAWERKRISNCVADYSVLYNS-TSFSTFKCYGVSATKLNLDLFCFSNVYADSFV                        |     |     |     |     |
| <b>SARS1</b>   | RVVPSGDVVRFPNITNLCPFGEVFNATKFPVSVYAWERKKISNCVADYSVLYNS-TFFSTFKCYGVSATKLNLDLFCFSNVYADSFV                       |     |     |     |     |
| <b>WIV1</b>    | RVAPSKEVVRFPNITNLCPFGEVFNATTFPSVYAWERKRISNCVADYSVLYNS-TSFSTFKCYGVSATKLNLDLFCFSNVYADSFV                        |     |     |     |     |
|                | * : * . : : * * * * * : * * * * * * * * * * * * * * * * * * * * * * * * * * * * * * * * * * * * * * * * * * : |     |     |     |     |
|                | 420                                                                                                           | 440 | 460 | 480 |     |
| <b>Rs4081</b>  | IRSSEVRQVAPGETGVIADYNYKLPDDFTGCVIAWNTAKQDQG-----QYYRSSRKTCLKPFERDLTSDE-----                                   |     |     |     |     |
| <b>RmYN02</b>  | IRFSEVRQIAPGETGVIADYNYKLPDDFTGCVLAWNTAQQDIG-----SYFYRSHRAVCLKPFERDLSSDE-----                                  |     |     |     |     |
| <b>Rf1</b>     | IRFSEVRQVAPGQGTGVIADYNYKLPDDFTGCVIAWNTAKQDVG-----SYFYRSHRSSLKLPFERDLSSDE-----                                 |     |     |     |     |
| <b>BM-4831</b> | VKGDDVRQIAPAQTGVIADYNYKLPDDFTGCVIAWNTNSLDS--SNE--FFYRFRHRGKIKPYGRDLSNVLNFPSSGGTCSA-EG                         |     |     |     |     |
| <b>BtKY72</b>  | VKGDDVRQIAPAQTGVIADYNYKLPDDFTGCVLAWNTNSVDSKSGNN--FYRFRHRGKIKPYERDISNVLNYSAGGTCSISQ                            |     |     |     |     |
| <b>pang17</b>  | VKGDEVQRQIAPGQGTGVIADYNYKLPDDFTGCVIAWNSVKQDALTGNGYGLYRFRKSKLPFERDISTEIQAGSTPCNGQVG                            |     |     |     |     |
| <b>SARS2</b>   | IRGDEVQRQIAPGQGTGKIADYNYKLPDDFTGCVIAWNSNLDLSDKVGNGYNYLYRFRKSNLKPFERDISTEIQAGSTPCNGVEG                         |     |     |     |     |
| <b>RaTG13</b>  | ITGDEVQRQIAPGQGTGKIADYNYKLPDDFTGCVIAWNSKHIDAKEGGNFNYLYRFRKANLKPFERDISTEIQAGSKPCNGQGTG                         |     |     |     |     |
| <b>SHC014</b>  | VKGDDVRQIAPGQGTGVIADYNYKLPDDFLGCVLAWNTNSKDSSTSGNYNYLYRWVRRSKLNPYERDLSDIYSPGGQSCSA-VG                          |     |     |     |     |
| <b>SARS1</b>   | VKGDDVRQIAPGQGTGVIADYNYKLPDDFMGCVLAWNTRNIDATSTGNINYKYRSLRHGKLRPFERDISNVPFSPDGKPCPT-PA                         |     |     |     |     |
| <b>WIV1</b>    | VKGDDVRQIAPGQGTGVIADYNYKLPDDFTGCVLAWNTRNIDATQTGNINYKYRSLRHGKLRPFERDISNVPFSPDGKPCPT-PA                         |     |     |     |     |
|                | : . : * * * * * : * * * * * * * * * * * * * * * * * * * * * * * * * * * * * * * * * * * * * * * * * * :       |     |     |     |     |
|                | 500                                                                                                           | 520 | 540 |     |     |
| <b>Rs4081</b>  | -NGVRTLSTYDFYNVPIEYQATRNVVLSFELLNAPATVCGPKLSTALVKNQCVNF                                                       |     |     |     |     |
| <b>RmYN02</b>  | -NGVRTLSTYDFNENVPLDYQATRNVVLSFELLNAPATVCGPKLSTQLVKNRCVNF                                                      |     |     |     |     |
| <b>Rf1</b>     | -NGVRTLSTYDFNQNPLEYQATRNVVLSFELLNAPATVCGPKLSTSLVKNQCVNF                                                       |     |     |     |     |
| <b>BM-4831</b> | LNCYKPLASYGFTQSSGIGFQPYRVVLSFELLNAPATVCGPKQSTELVKNKCVNF                                                       |     |     |     |     |
| <b>BtKY72</b>  | LGCYEPLKSYGFTPTVGVGYPYRVVLSFELLNAPATVCGPKKSTELVKNKCVNF                                                        |     |     |     |     |
| <b>pang17</b>  | LNCYYPLERYGFHPTTGVDYQPFYRVVLSFELLNAPATVCGPKLSTTLVKNKCVNF                                                      |     |     |     |     |
| <b>SARS2</b>   | FNCYYPLQSYGFQPTNGVGYQPYRVVLSFELLHAPATVCGPKKSTNLVKNKCVNF                                                       |     |     |     |     |
| <b>RaTG13</b>  | LNCYYPLYRYGFYPTDGVGHQPYRVVLSFELLNAPATVCGPKKSTNLVKNKCVNF                                                       |     |     |     |     |
| <b>SHC014</b>  | PNCYNPLRPYGFFTTAGVGHQPYRVVLSFELLNAPATVCGPKLSTDLIKNQCVNF                                                       |     |     |     |     |
| <b>SARS1</b>   | LNCYWPLNDYGFYTTTGIGYQPYRVVLSFELLNAPATVCGPKLSTDLIKNQCVNF                                                       |     |     |     |     |
| <b>WIV1</b>    | FNCYWPLNDYGFYITNGIGYQPYRVVLSFELLNAPATVCGPKLSTDLIKNQCVNF                                                       |     |     |     |     |
|                | . * * * * . : * * * * * * * * * * * * * * * * * * * * * * * * * * * * * * * * * * * * * * * * * * :           |     |     |     |     |

\* = fully conserved  
: = strongly similar  
. = weakly similar

**Supplementary Fig. 1. Sarbecovirus RBD sequence alignment.** Amino acid sequence alignment of sarbecovirus RBDs used in this study, numbered according to Spike protein of SARS2 Wuhan variant.

## A Sarbecovirus RBD Protein Identity

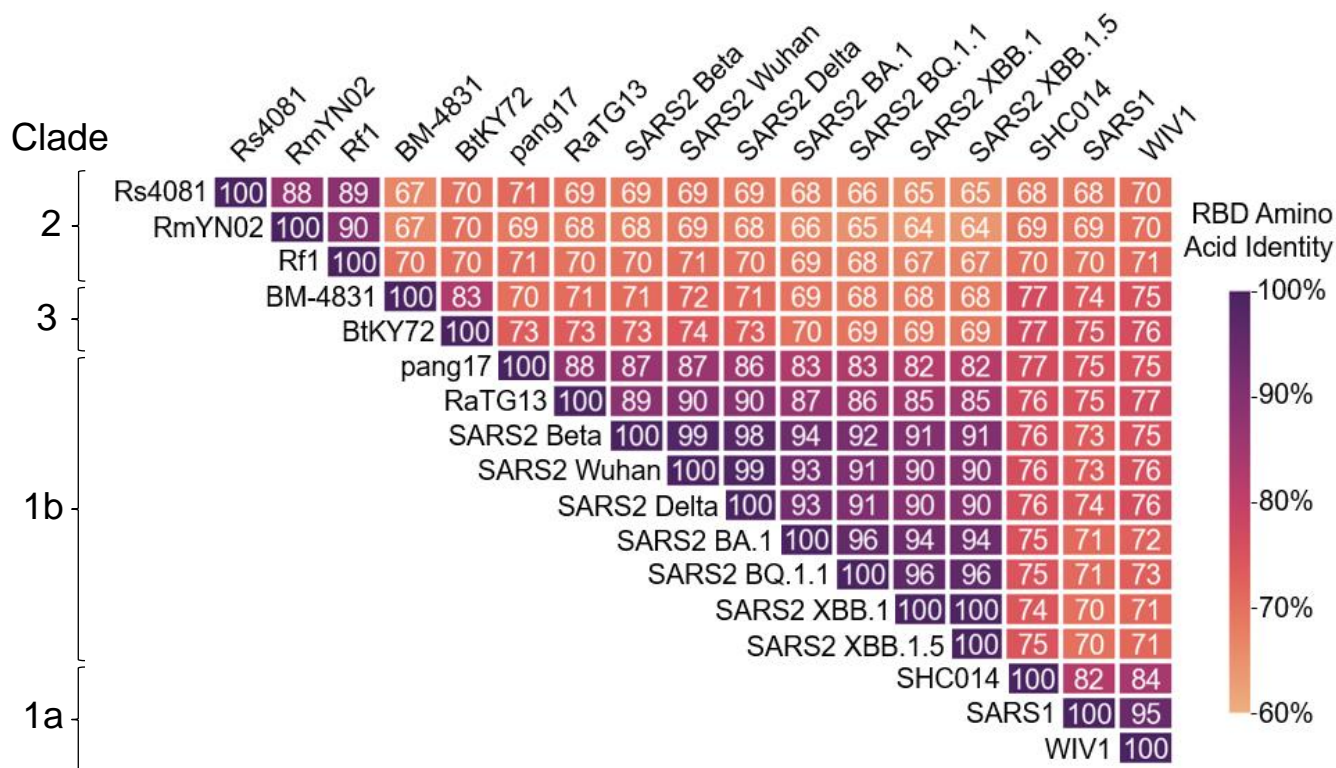

## B Map of Residue Conservation

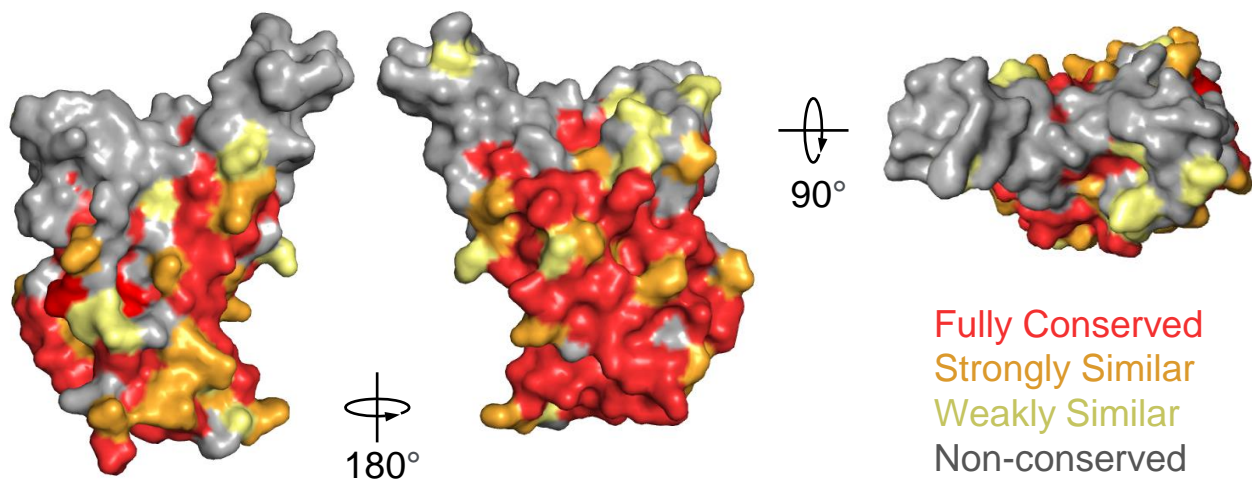

**Supplementary Fig. 2. RBD residue conservation.** (A) Heat map of percent amino acid identity between sarbecovirus RBDs used in this study. (B) Conservation of residues between sarbecoviruses used in the study, as mapped onto the SARS2 Wuhan RBD crystal structure (PDB ID: 6ZER). Multiple orientations of the same RBD are shown, represented as the van der Waals surface.

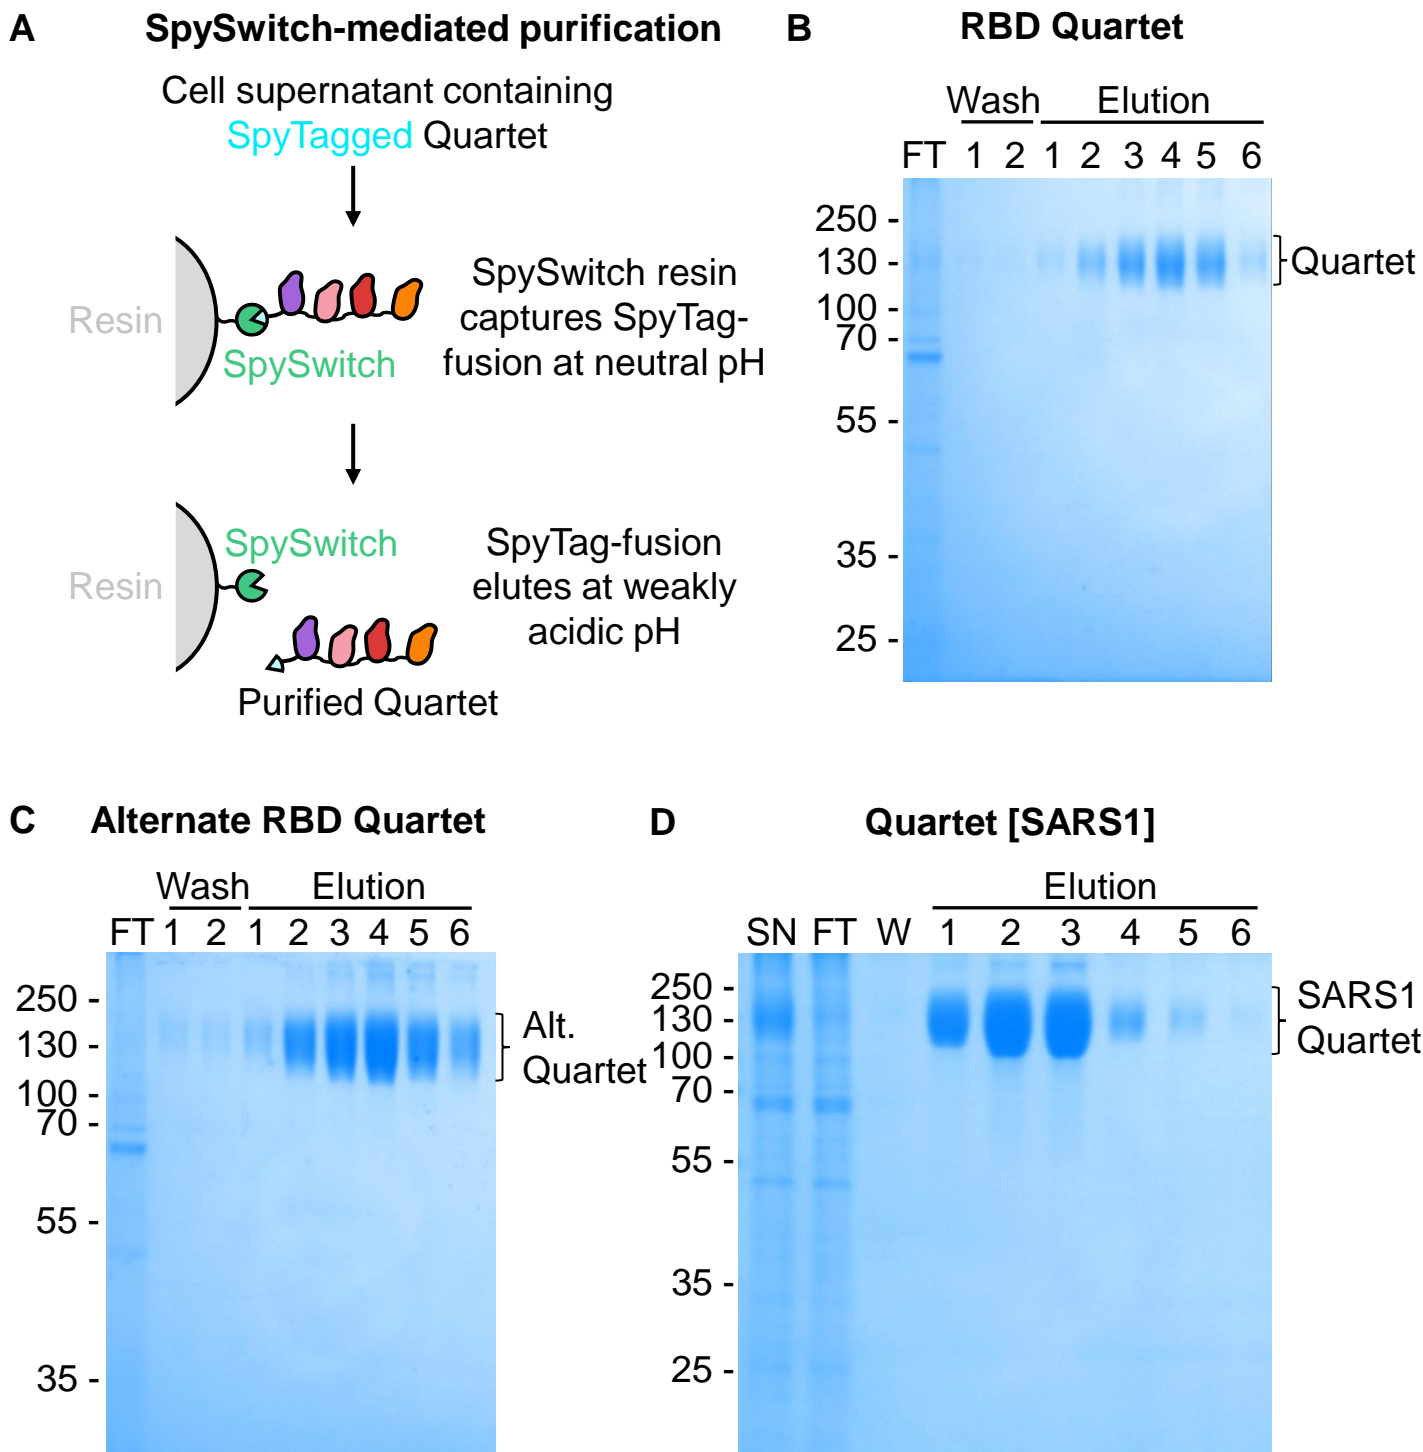

**Supplementary Fig. 3. SpySwitch purification of RBD quartets.** (A) Schematic of SpySwitch affinity purification. SpyTag genetically fused to the Quartet has a non-covalent interaction with SpySwitch at a neutral pH, before eluting at a weakly acidic pH through charge-charge repulsion. This system was used to purify (B) RBD Quartet, (C) Alternate RBD Quartet, and (D) RBD Quartet with SARS1 in place of SARS2. The supernatant (SN), flowthrough (FT), wash (W) and elution fractions were analyzed by SDS-PAGE with Coomassie staining. A representative gel from two independent purifications. Molecular weight markers are in kDa.

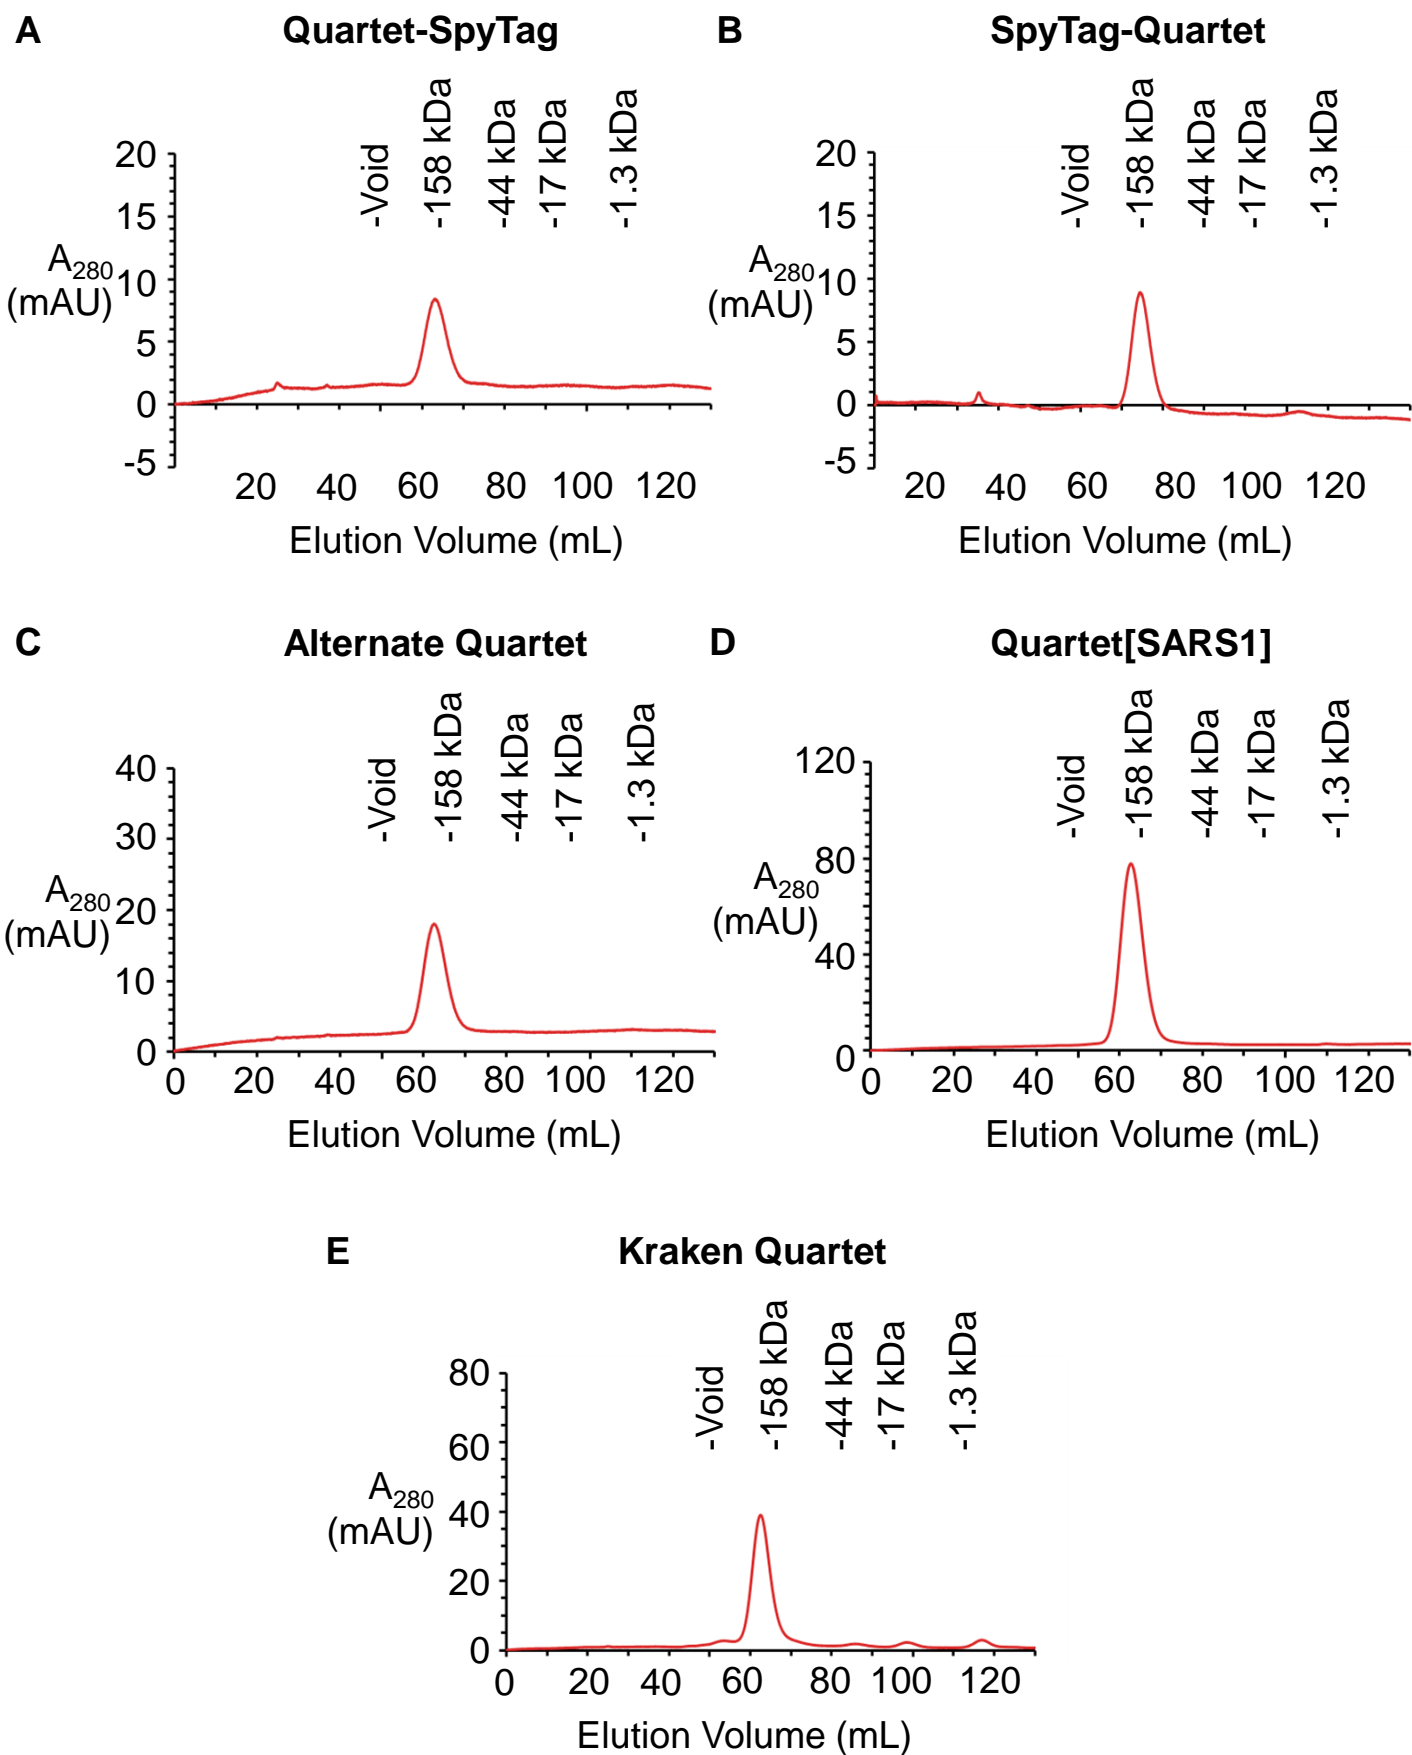

**Supplementary Fig. 4. Size-exclusion chromatography of Quartets.** Quartets were run on an S200 Sephacryl column in PBS pH 7.4 after purification by SpySwitch, with gel filtration standards shown. Absorbance is measured in mAU. Absorbance peak size differs in line with the different loaded concentrations.

**A**

**Post-Prime RBD ELISAs**

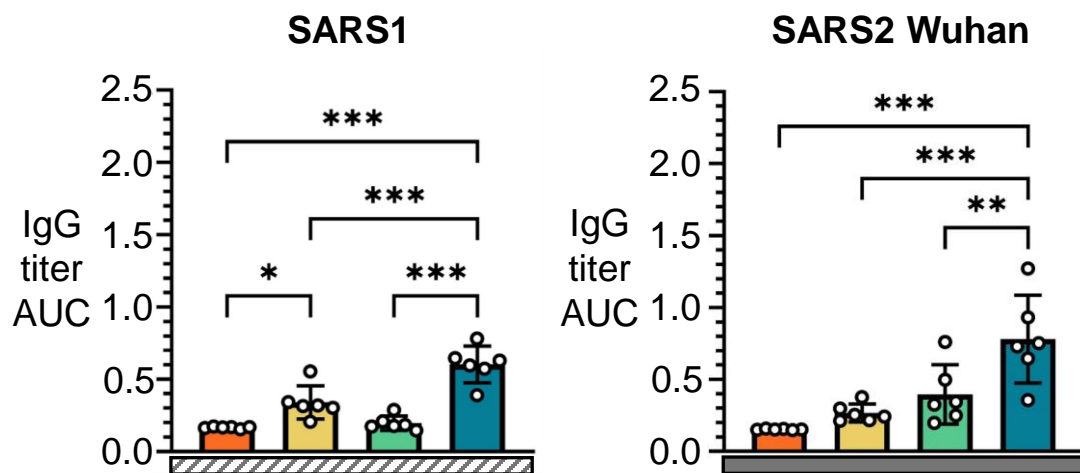

**B**

**Post-Boost SARS2 Spike ELISAs**

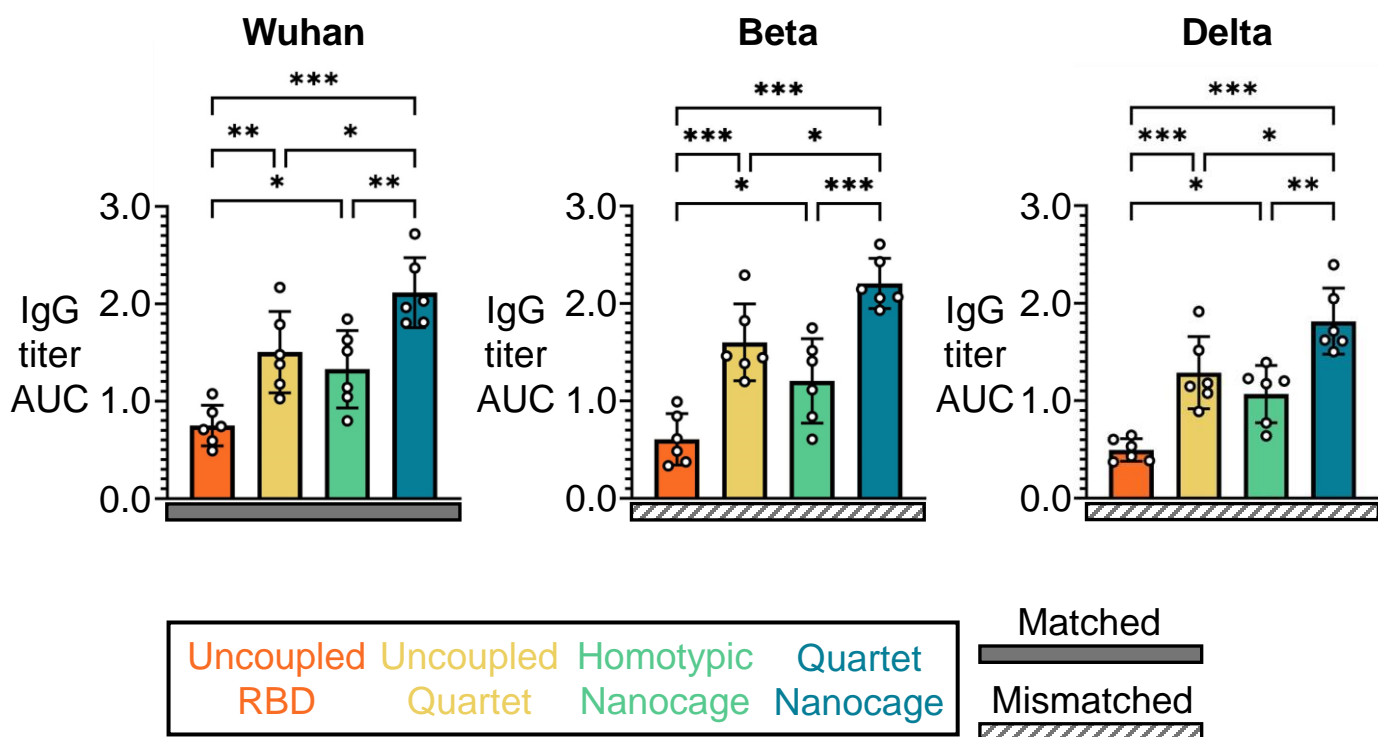

**Supplementary Fig. 5. Further Breadth of Immune Response from Immunization with Quartet Nanocages.** Binding data for serum IgG antibodies presented as area under the curve of a serial sera dilution. Sera samples are from mice immunized with uncoupled SARS2 Wuhan RBD (orange), Uncoupled Quartet (yellow), SARS2 Wuhan RBD coupled to SpyCatcher003-mi3 (Homotypic Nanocage, green), and Quartet Nanocage (blue) as outlined in Fig. 2. Solid gray rectangles under samples indicate the ELISA is against a component of that vaccine (matched), while striped rectangles indicate the ELISA is against an antigen absent in that vaccine (mismatched). Each dot represents serum from one animal. The mean is denoted by a bar, shown  $\pm$  1 s.d.,  $n = 6$ . Significance was calculated with an ANOVA test using Tukey's post hoc test. \*  $p < 0.05$ , \*\*  $p < 0.01$ , \*\*\*  $p < 0.001$ ; other comparisons were non-significant. Graphs demonstrate the binding of (A) post-prime sera to RBDs and (B) post-boost sera to SARS2 variant Spike proteins.

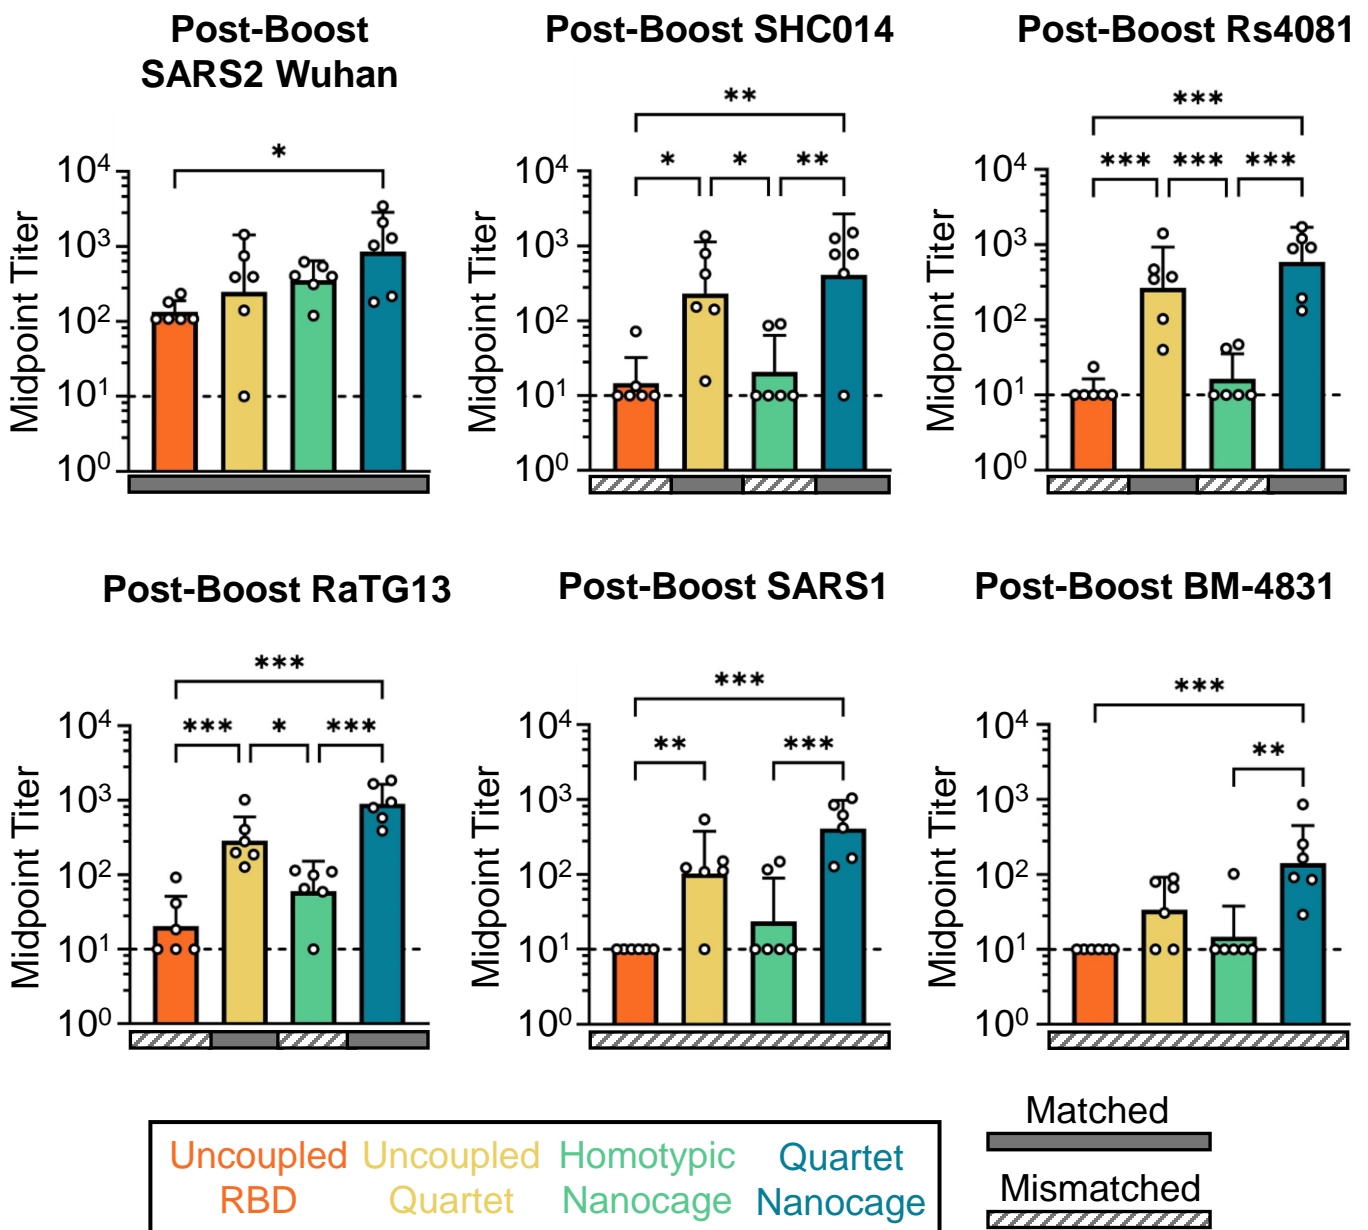

**Supplementary Fig. 6. Midpoint Titers from Immunization with Quartet Nanocages.** Binding data for serum IgG antibodies presented as midpoint titers, calculated from curve of a serial dilution of serum. Sera samples are from mice immunized with uncoupled SARS2 Wuhan RBD (orange), Uncoupled Quartet (yellow), SARS2 Wuhan RBD coupled to SpyCatcher003-mi3 (Homotypic Nanocage, green), and Quartet Nanocage (blue) as outlined in Fig. 2. Solid gray rectangles under samples indicate the ELISA is against a component of that vaccine (matched), while striped rectangles indicate the ELISA is against an antigen absent in that vaccine (mismatched). Each dot represents serum from one animal. The mean is denoted by a bar, shown + 1 s.d., n = 6. Significance was calculated with an ANOVA test, followed by Tukey's multiple comparison post hoc test of  $ID_{50}$  values converted to  $\log_{10}$  scale. \* p < 0.05, \*\* p < 0.01, \*\*\* p < 0.001; other comparisons were non-significant. Dashed horizontal lines represent the limit of detection.

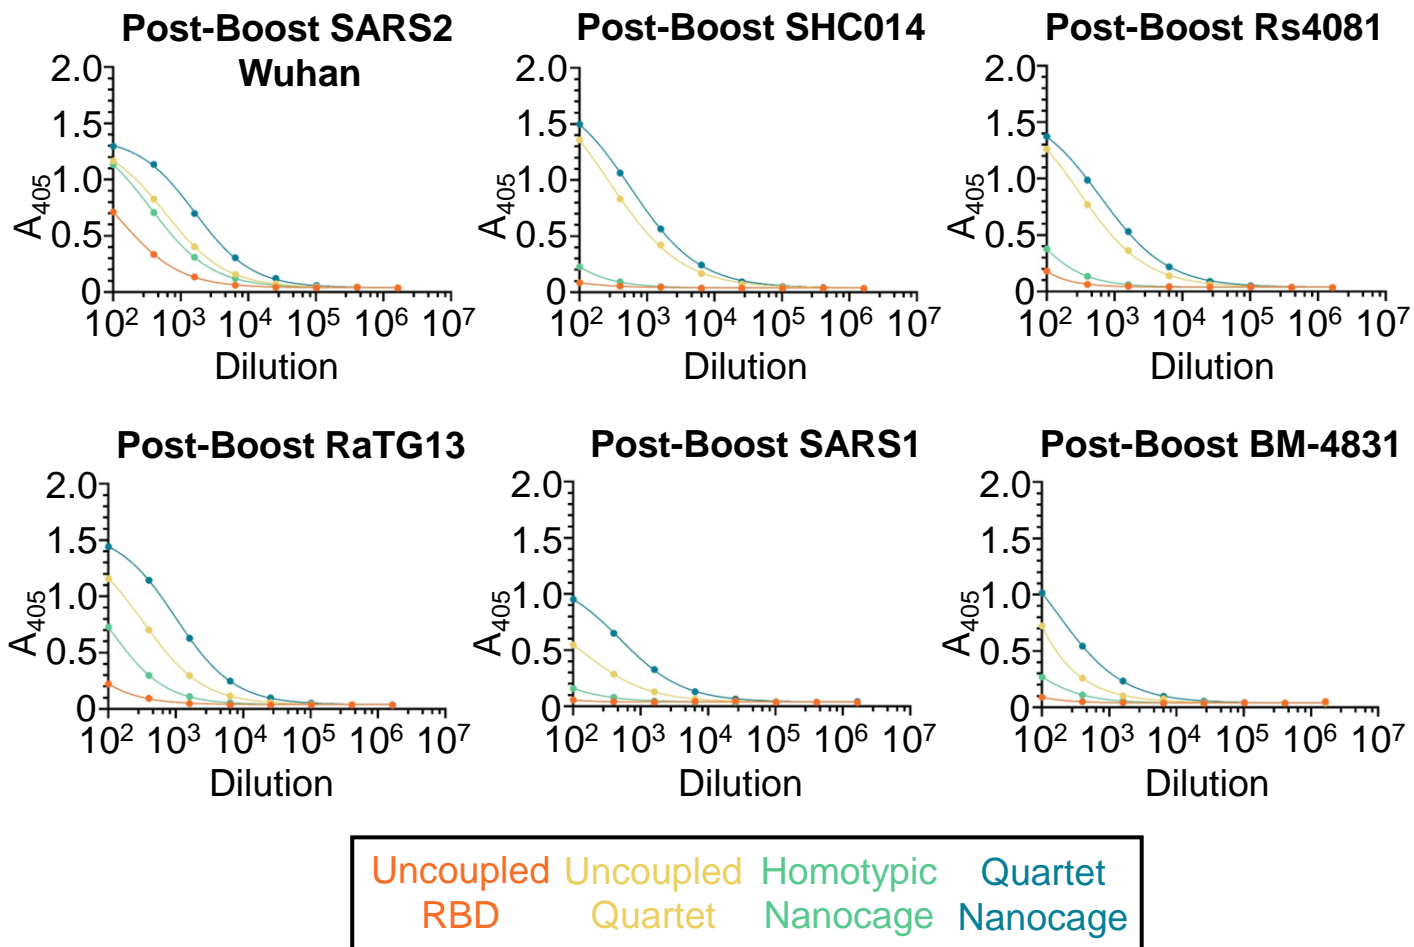

**Supplementary Fig. 7. Serum binding curves from immunization with Quartet Nanocages.** ELISA binding data are presented for a serial dilution of sera from mice immunized with uncoupled SARS2 Wuhan RBD (orange), Uncoupled Quartet (yellow), SARS2 Wuhan RBD coupled to SpyCatcher003-mi3 (Homotypic Nanocage, green), and Quartet Nanocage (blue) as outlined in Fig. 2. The mean absorbance (duplicate measurements for  $n=6$  serum samples) for each immunization condition at each dilution is plotted. A curve is fit and plotted for each immunization condition.



### A SpyTag-Quartet

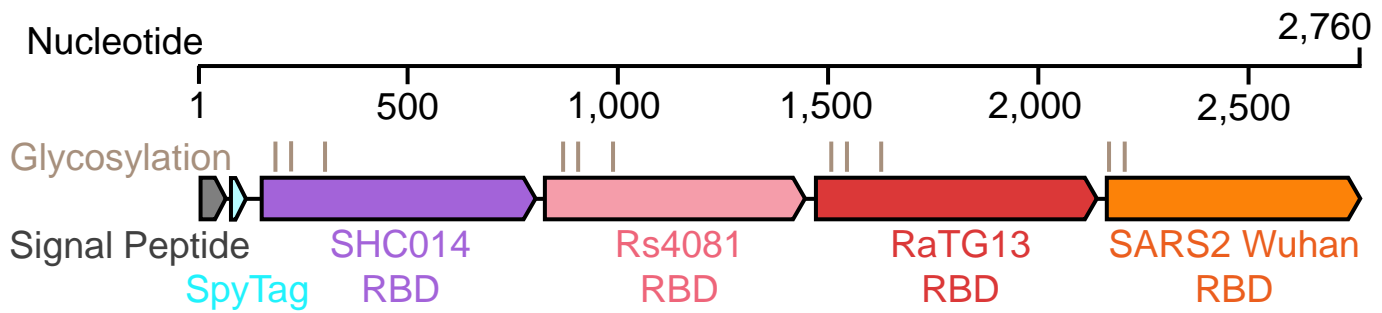

### B Alternate Quartet

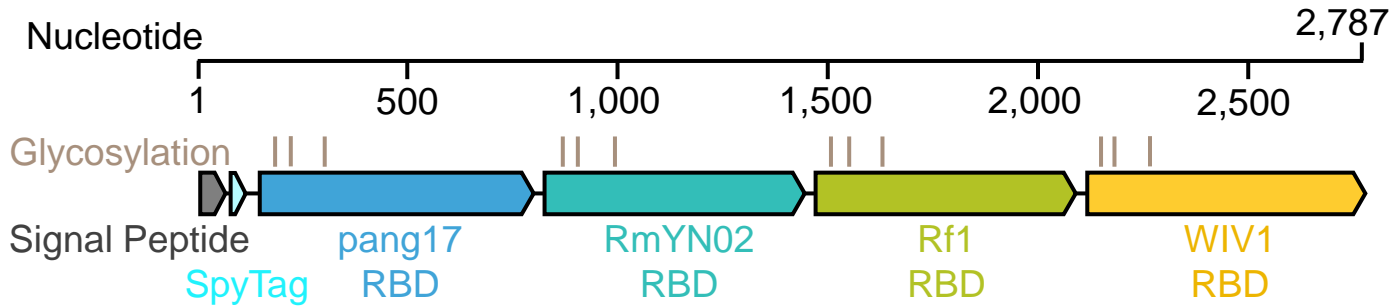

### C Quartet [SARS1]

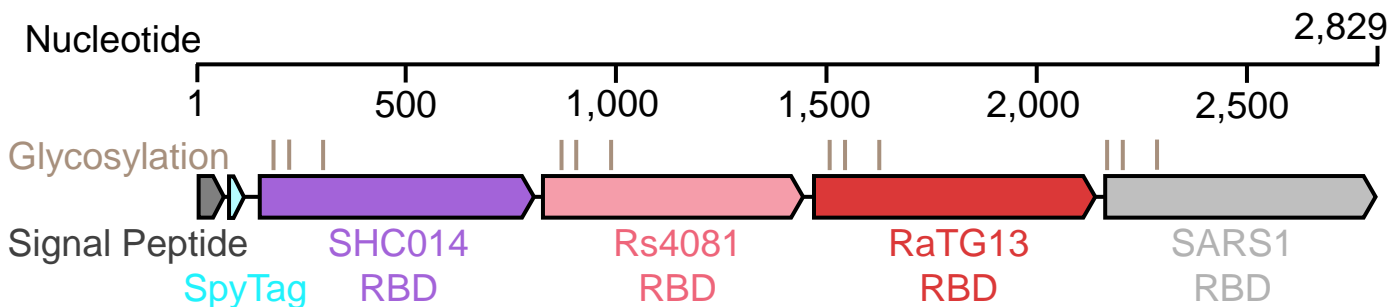

### D Kraken Quartet

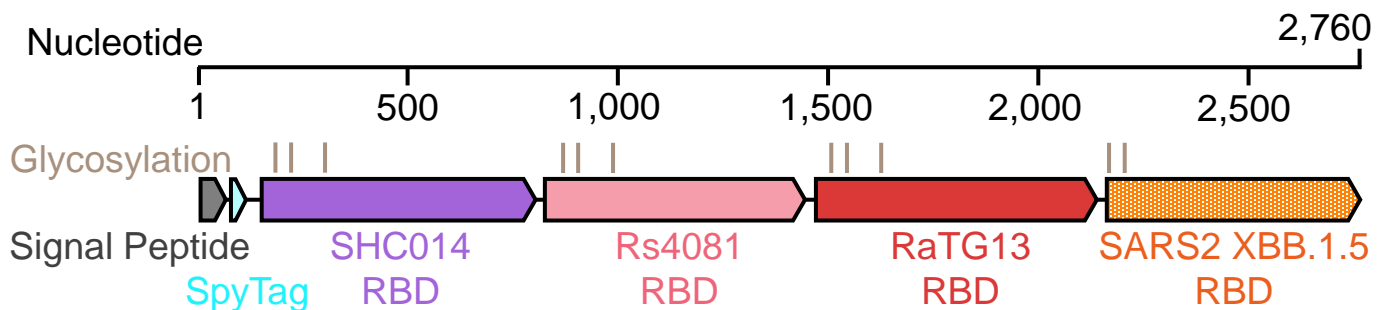

**Supplementary Fig. 8. Schematic of Different Quartets.** Genetic organization of (A) SpyTag-Quartet, (B) Alternate RBD Quartet, (C) Quartet [SARS1], and (D) Kraken Quartet (with SARS2 Omicron XBB.1.5). These schematics indicate the virus origin of each RBD, predicted N-linked glycosylation sites, tag location, and nucleotide number.

## A Negative Stain Transmission Electron Microscopy

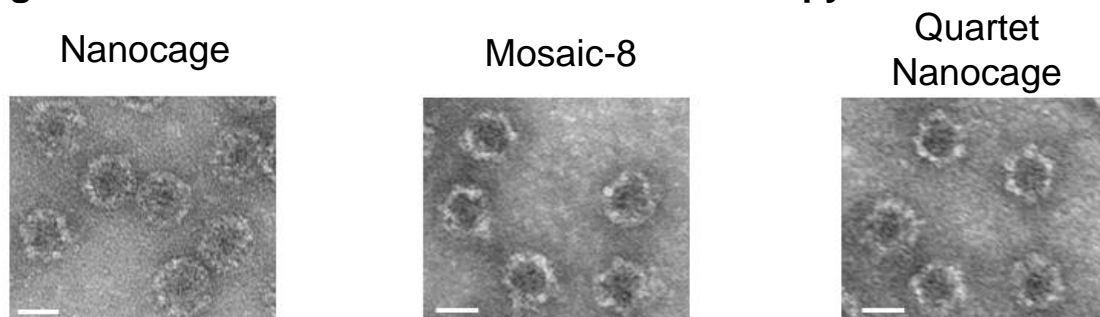

B

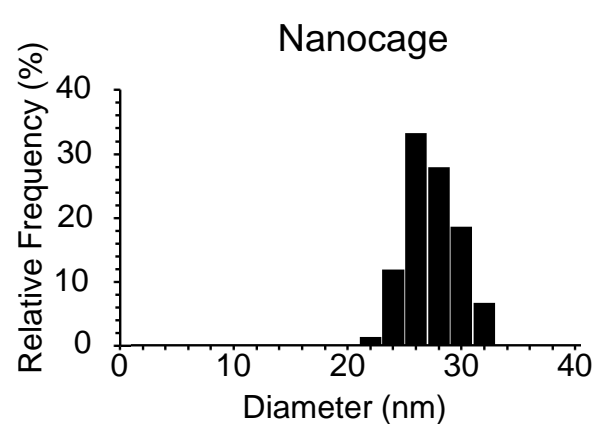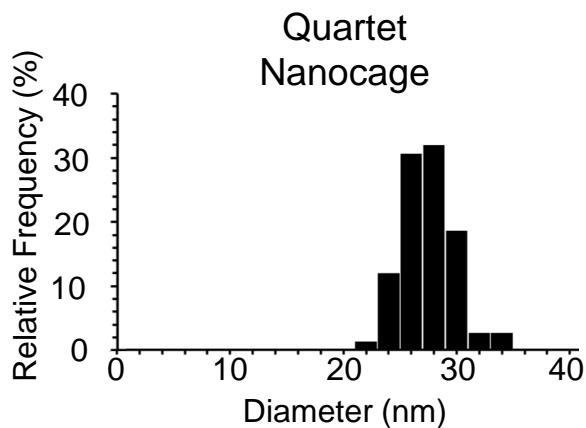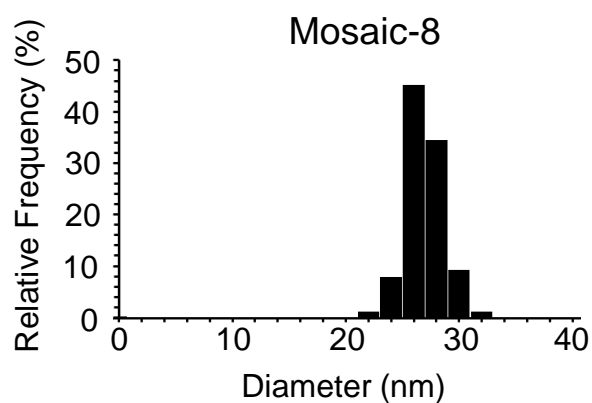

C

|                  | Diameter (nm)  |
|------------------|----------------|
| Nanocage         | $28.5 \pm 2.2$ |
| Mosaic-8         | $27.9 \pm 1.7$ |
| Quartet Nanocage | $28.5 \pm 2.3$ |

**Supplementary Fig. 9. Negative stain TEM of nanocage immunogens.** (A) Representative negative stain TEM images of uncoupled Nanocage, Mosaic-8 nanoparticles, and Quartet Nanocages. Scale bar is 20 nm. (B) Size distribution of nanoparticles measured by TEM with 2 nm bin size ( $n = 75$ ). (C) Table of the size distribution of different nanoparticles: mean  $\pm$  1 s.d. ( $n = 75$ ).

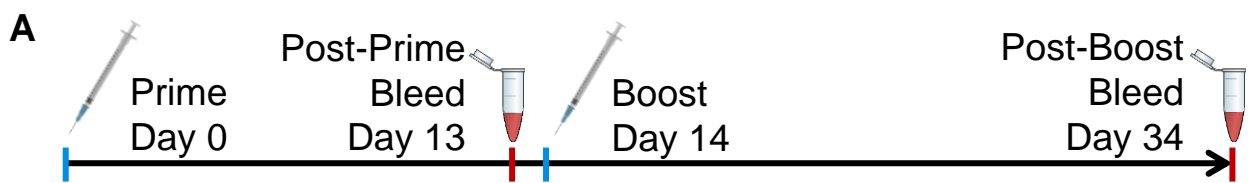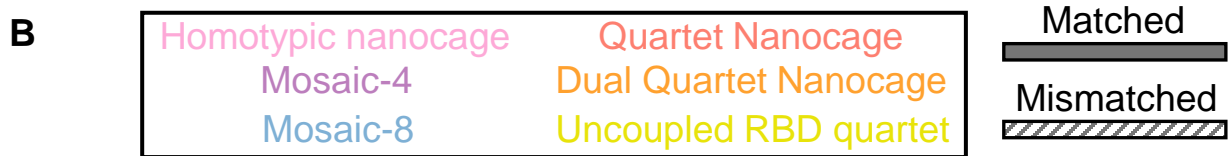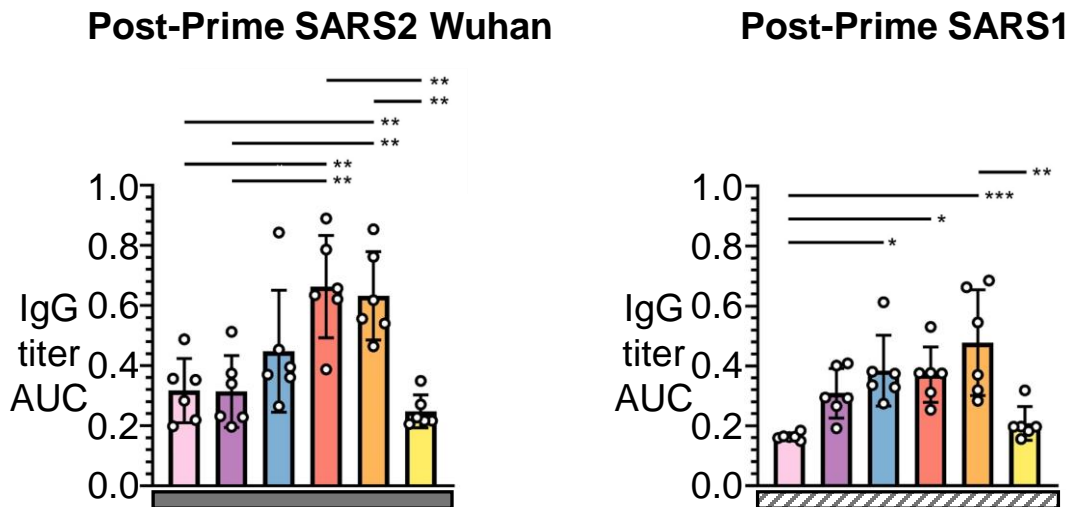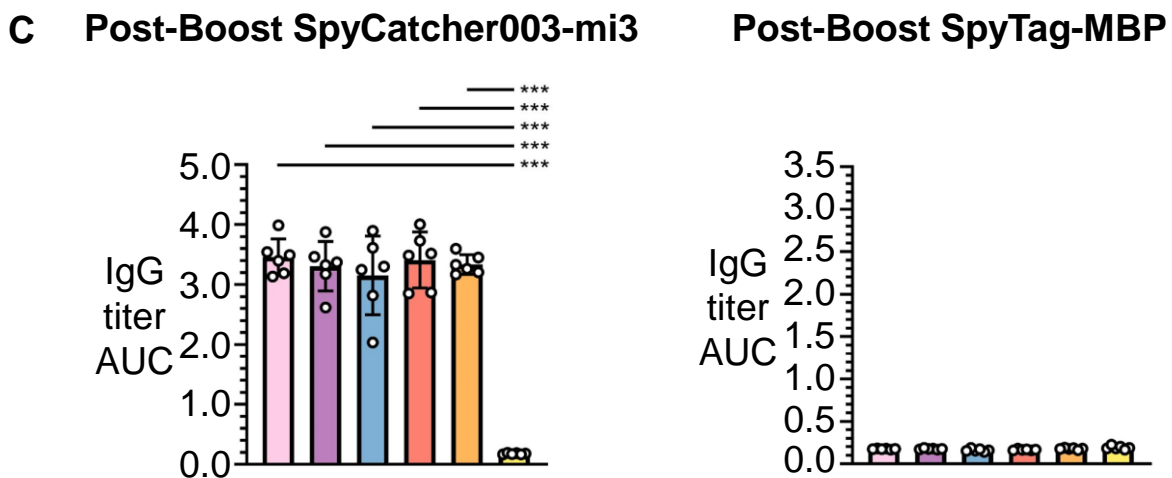

**Supplementary Fig. 10. Breadth of antibody induction by Quartet and Mosaic Immunogens.** (A) Summary of timeline for this set of immunizations with 0.02 nmol antigen per dose. (B-C) ELISA for serum IgG from mice immunized with the indicated immunogen. Each dot represents serum from one animal. (B) Post-prime response to SARS2 or SARS1. (C) Post-boost response to SpyCatcher003-mi3 or SpyTag-MBP. The mean is denoted by a bar, with error bars  $\pm 1$  s.d.,  $n = 6$ . Significance was calculated with an ANOVA test using Tukey's post hoc test. No significance test was performed for SpyTag-MBP responses. \*  $p < 0.05$ , \*\*  $p < 0.01$ , \*\*\*  $p < 0.001$ ; other comparisons were non-significant.

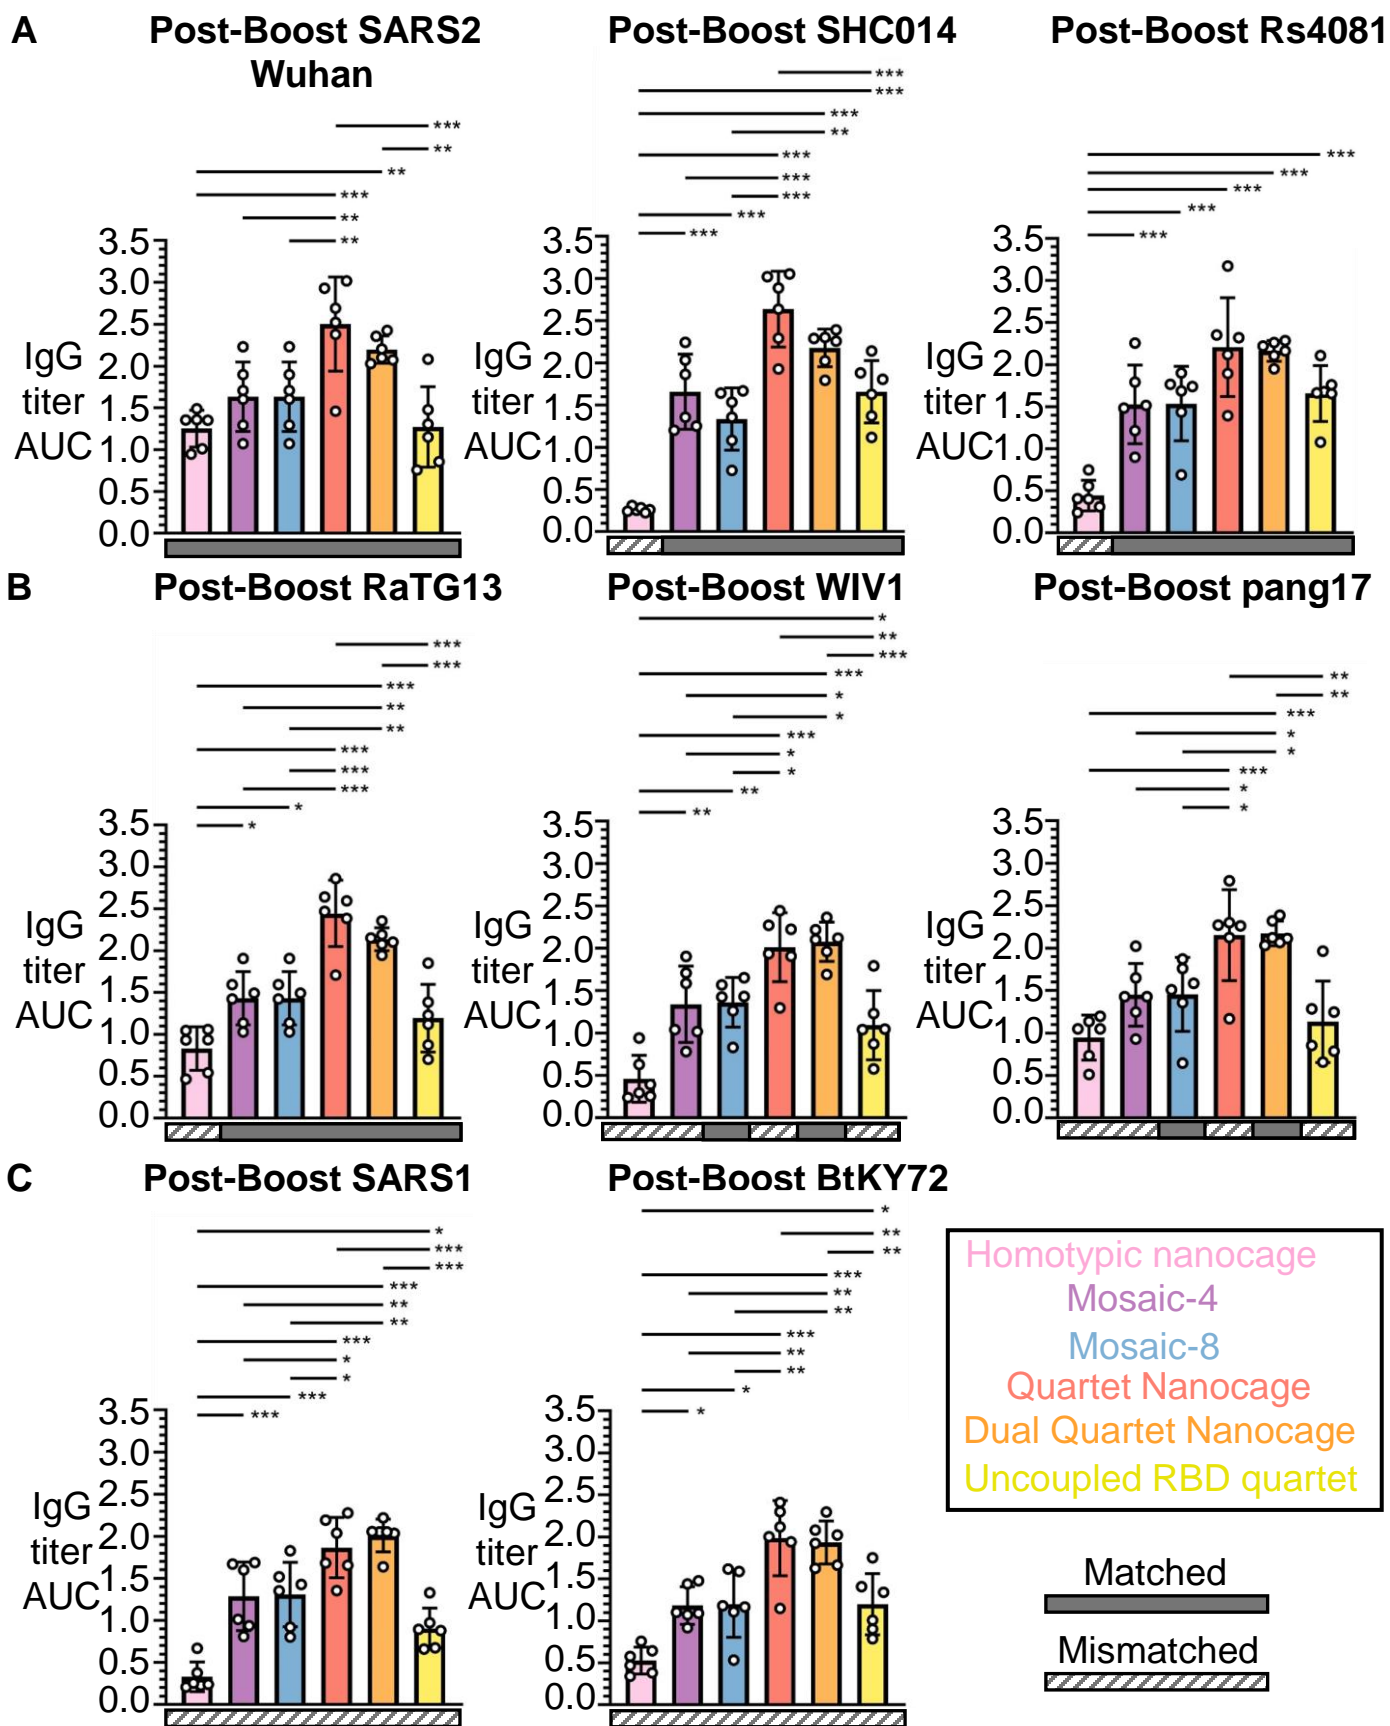

**Supplementary Fig. 11. Further breadth of antibody induction by Quartet and Mosaic immunogens.** ELISA for serum IgG from mice immunized with the indicated immunogen with 0.02 nmol antigen per dose presented as area under the curve of a serial sera dilution. Each dot represents serum from one animal. The mean is denoted by a bar, with error bars  $\pm 1$  s.d.,  $n = 6$ . Significance was calculated with an ANOVA test using Tukey's post hoc test. \*  $p < 0.05$ , \*\*  $p < 0.01$ , \*\*\*  $p < 0.001$ ; other comparisons were non-significant. (A) Post-boost response to SARS2, SHC014 and Rs4081. (B) Post-boost response to RaTG13, WIV1 and pang17. (C) Post-boost response to SARS1 and BtKY72.

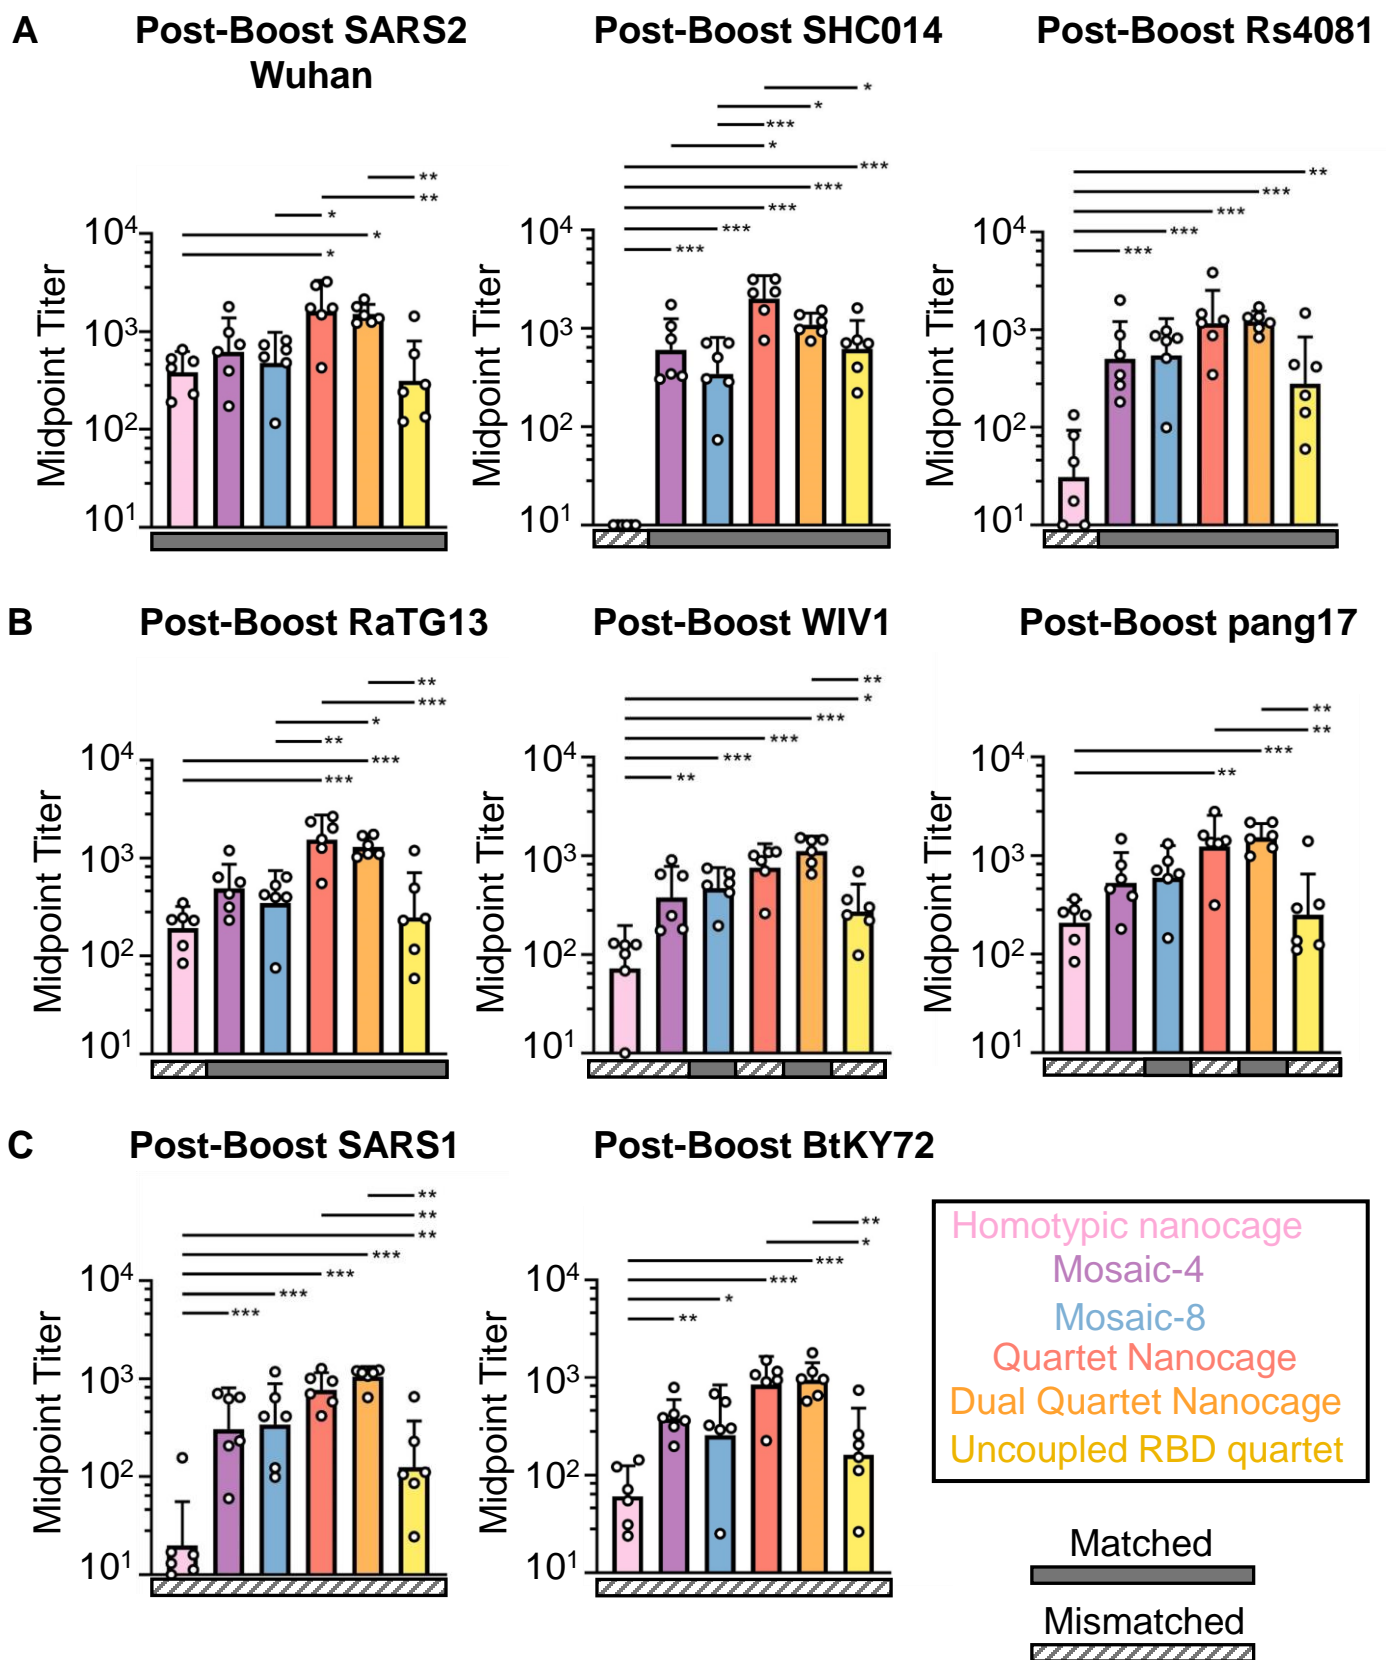

**Supplementary Fig. 12 Midpoint titers for antibody induction by Quartet and Mosaic immunogens.** ELISA for serum IgG from mice immunized with the indicated immunogen with 0.02 nmol antigen per dose presented as midpoint titers. Each dot represents serum from one animal. The mean is denoted by a bar, with error bars + 1 s.d., n = 6. Significance was calculated with an ANOVA test using Tukey's post hoc test. \*  $p < 0.05$ , \*\*  $p < 0.01$ , \*\*\*  $p < 0.001$ ; other comparisons were non-significant. (A) Post-boost response to SARS2, SHC014 and Rs4081. (B) Post-boost response to RaTG13, WIV1 and pang17. (C) Post-boost response to SARS1 and BtKY72.

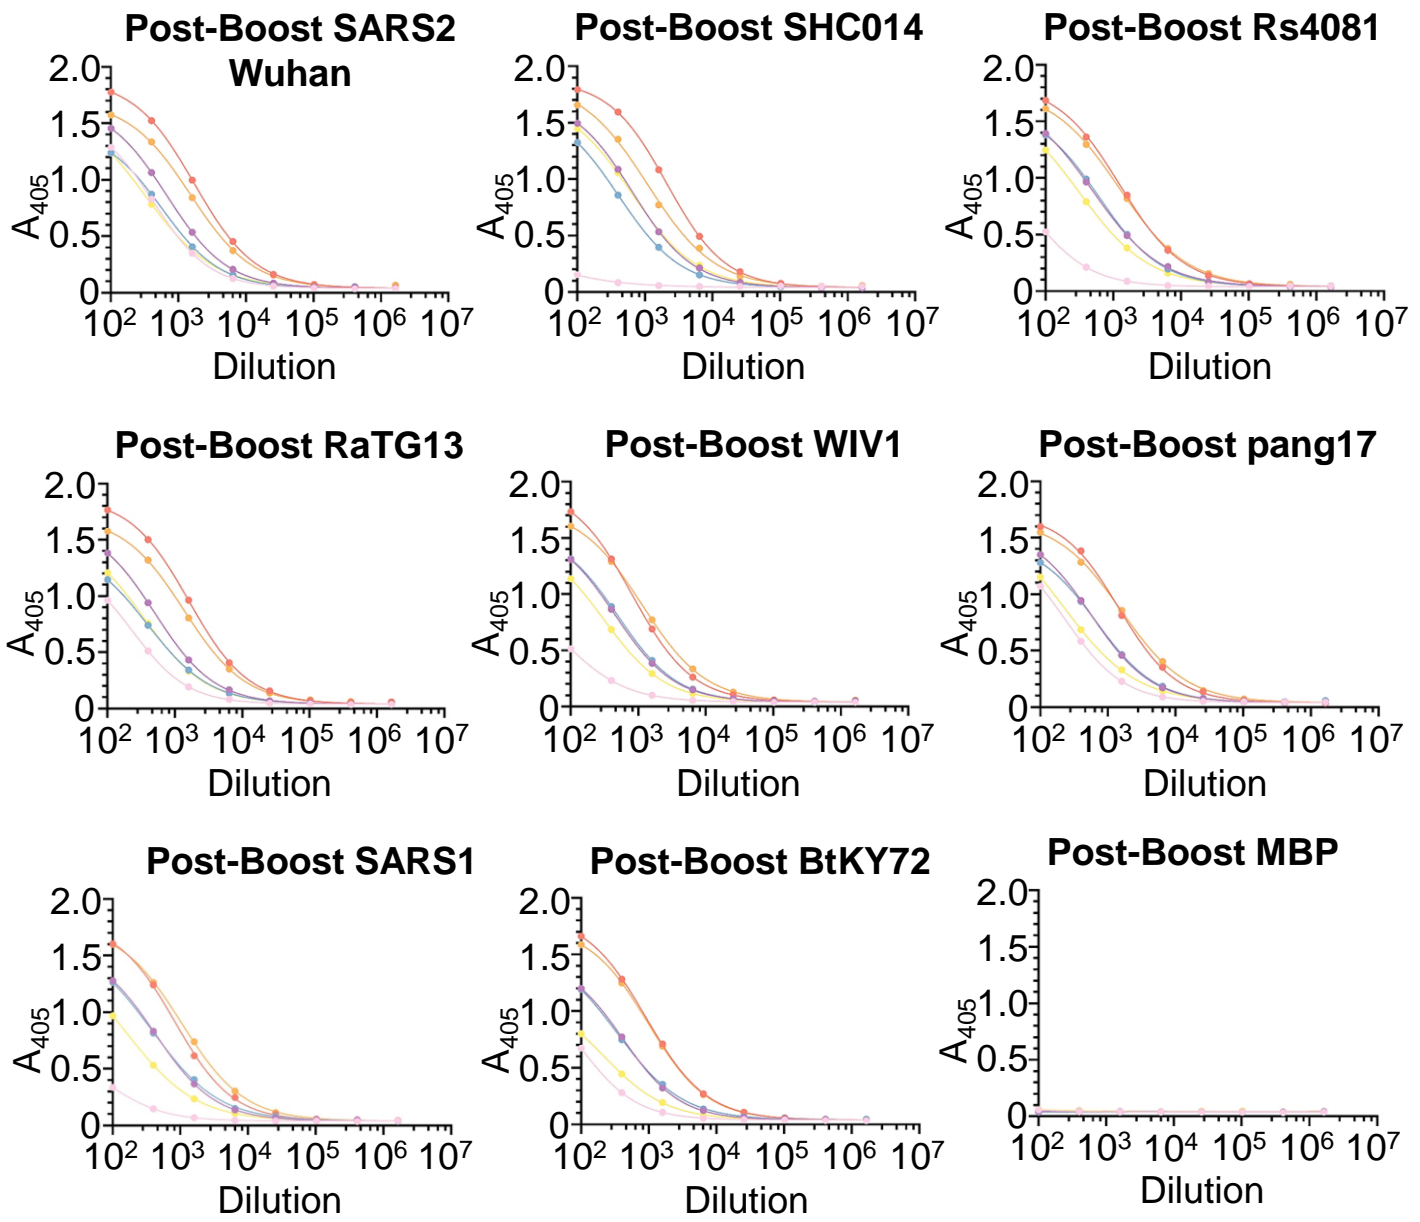

|                    |          |          |                  |                       |                   |
|--------------------|----------|----------|------------------|-----------------------|-------------------|
| Homotypic Nanocage | Mosaic-4 | Mosaic-8 | Quartet Nanocage | Dual Quartet Nanocage | Uncoupled Quartet |
|--------------------|----------|----------|------------------|-----------------------|-------------------|

**Supplementary Fig. 13. Serum binding curves for comparison of Quartet and Mosaic immunogens.** ELISA binding data are presented for a serial dilution of sera from mice immunized with the indicated immunogen with 0.02 nmol antigen per dose presented as midpoint titers. The mean absorbance (duplicate measurements for  $n=6$  serum samples) for each immunization condition at each dilution is plotted. A curve is fit and plotted for each immunization condition.

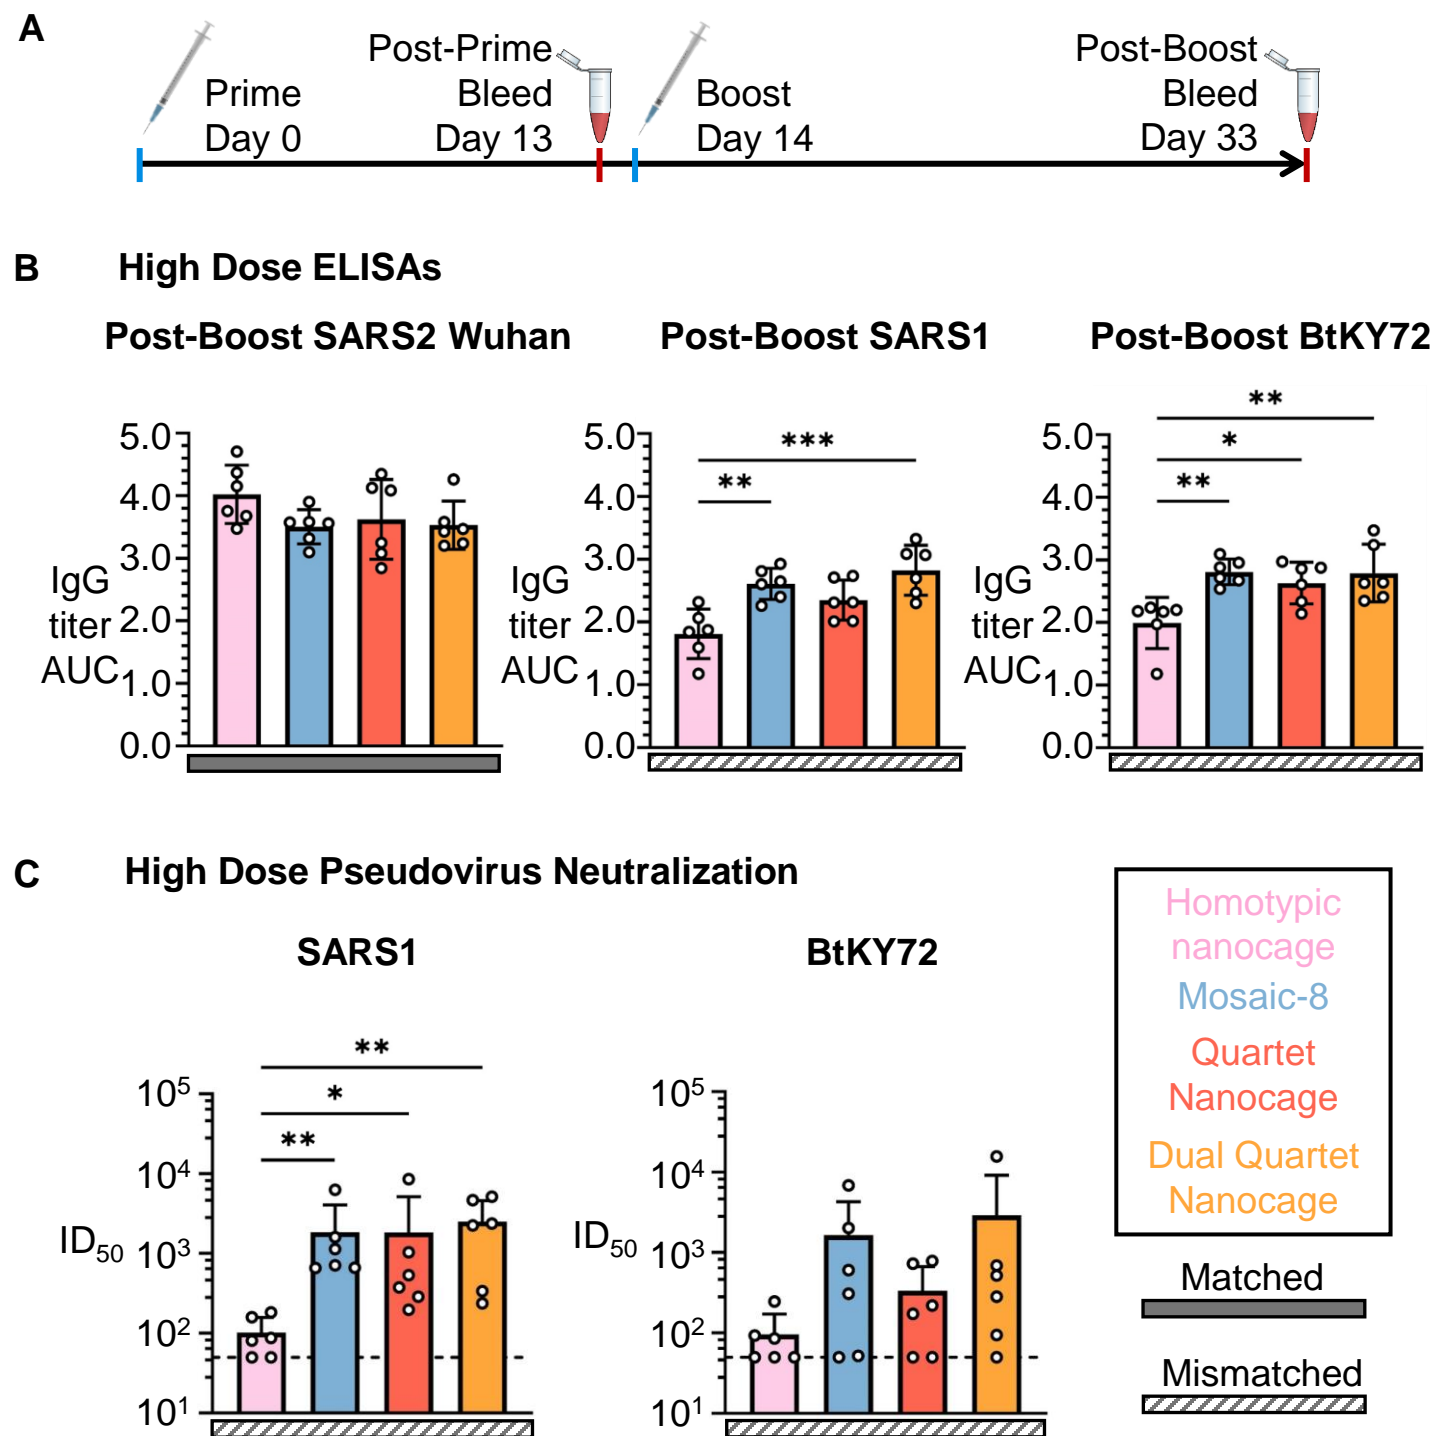

**Supplementary Fig. 14. Immune response raised by higher dose of Quartet and Mosaic immunogens.** This figure assesses antisera raised by immunizations with 0.2 nmol antigen. **(A)** Timeline for this set of immunizations. **(B)** ELISA for post-boost sera assessing IgG binding to SARS2, SARS1 and BtKY72 RBD is shown as the area under the curve (AUC) of a serial dilution. Each dot represents serum from one animal. The mean AUC is denoted by a bar, with error bars  $\pm 1$  s.d.,  $n = 6$ . **(C)** Neutralization of SARS1 and BtKY72 (K493Y/T498W) pseudovirus by boosted mouse sera. Solid gray rectangles under samples indicate the ELISA is against a component of that vaccine (matched). Striped rectangles indicate the ELISA is against an antigen absent in that vaccine (mismatched). Dashed horizontal lines represent the limit of detection. The mean ID<sub>50</sub> is denoted by a bar, with error bars  $+ 1$  s.d.,  $n = 6$ . Significance was calculated with an ANOVA test, followed by Tukey's multiple comparison post hoc test of ID<sub>50</sub> values converted to log<sub>10</sub> scale. \*  $p < 0.05$ , \*\*  $p < 0.01$ , \*\*\*  $p < 0.001$ ; other comparisons were non-significant.

## A High Dose Pseudovirus Neutralization

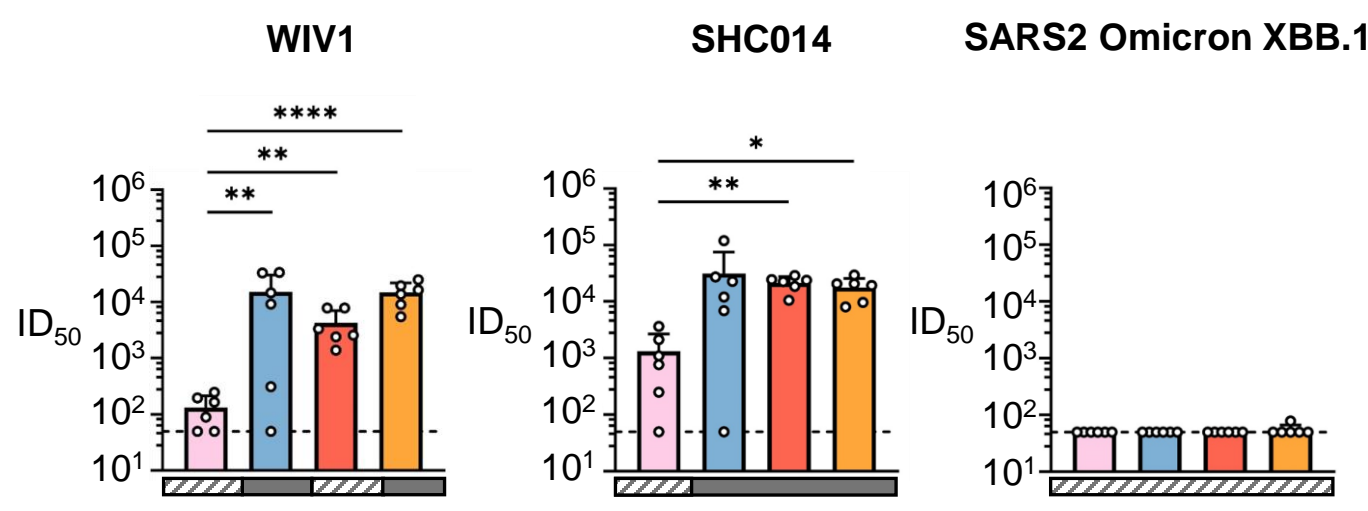

## B High Dose SARS2 Variant Neutralization

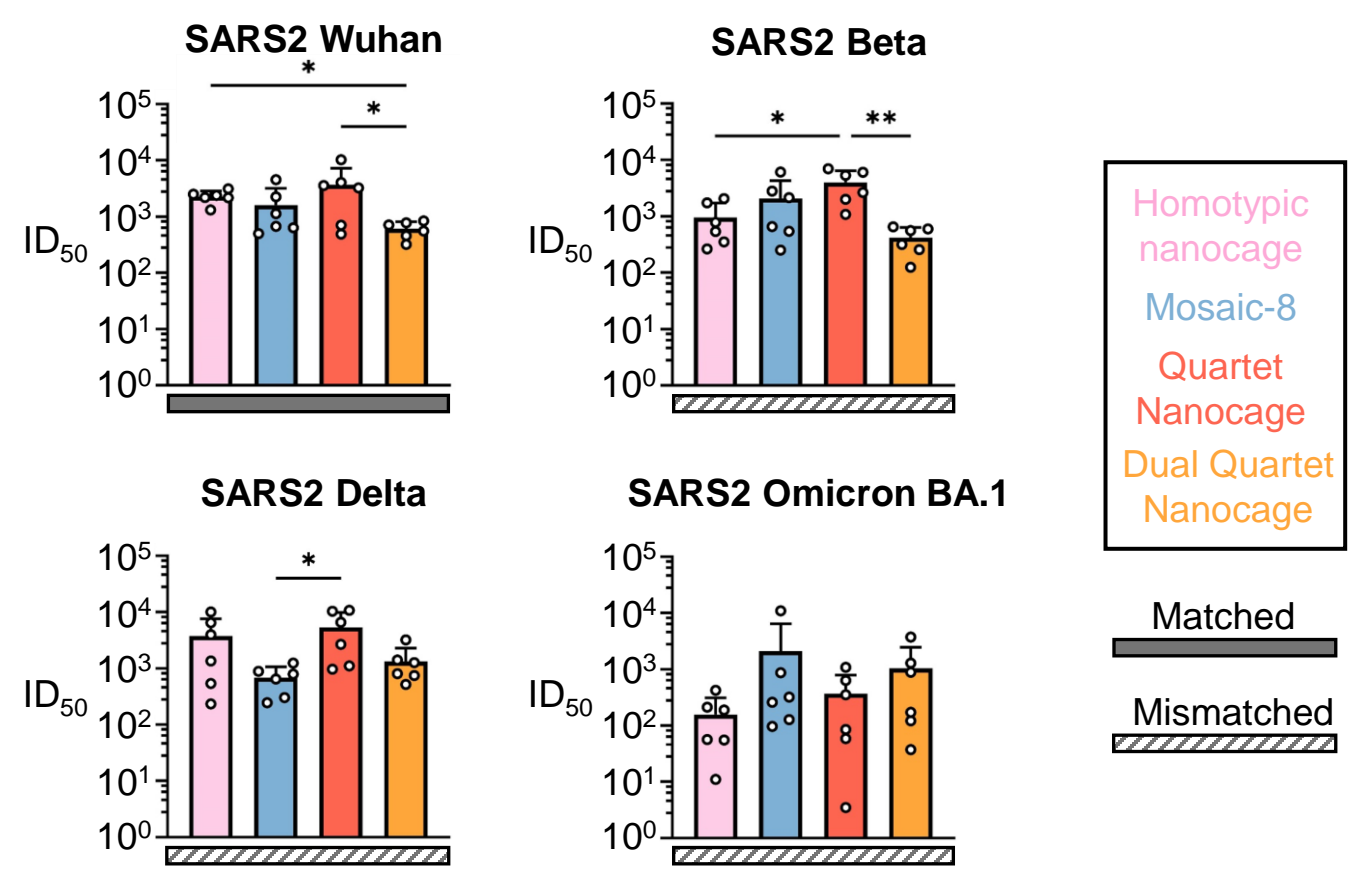

**Supplementary Fig. 15. Pseudovirus neutralization by higher dose of Quartet and Mosaic immunogens.** These figures assess antisera raised by immunizations with 0.2 nmol antigen, a 10-fold increase relative to prior immunizations. Solid gray rectangles under samples indicate the ELISA is against a component of that vaccine (matched). Striped rectangles indicate the ELISA is against an antigen absent in that vaccine (mismatched). Dashed horizontal lines represent the limit of detection. Each dot represents the response for one animal. Mean  $ID_{50}$  is denoted by a bar, with error bars + 1 s.d., n = 6. Significance was calculated with an ANOVA test, followed by Tukey's multiple comparison post hoc test of  $ID_{50}$  values converted to  $\log_{10}$  scale. \* p < 0.05, \*\* p < 0.01, \*\*\* p < 0.001; other comparisons were non-significant. **(A)** Neutralization of WIV1, SHC014 and SARS2 Omicron XBB.1 pseudoviruses. **(B)** Neutralization of the Wuhan, Beta, Delta and Omicron BA.1 SARS2 variant viruses.



# High Dose Virus Neutralization Curves

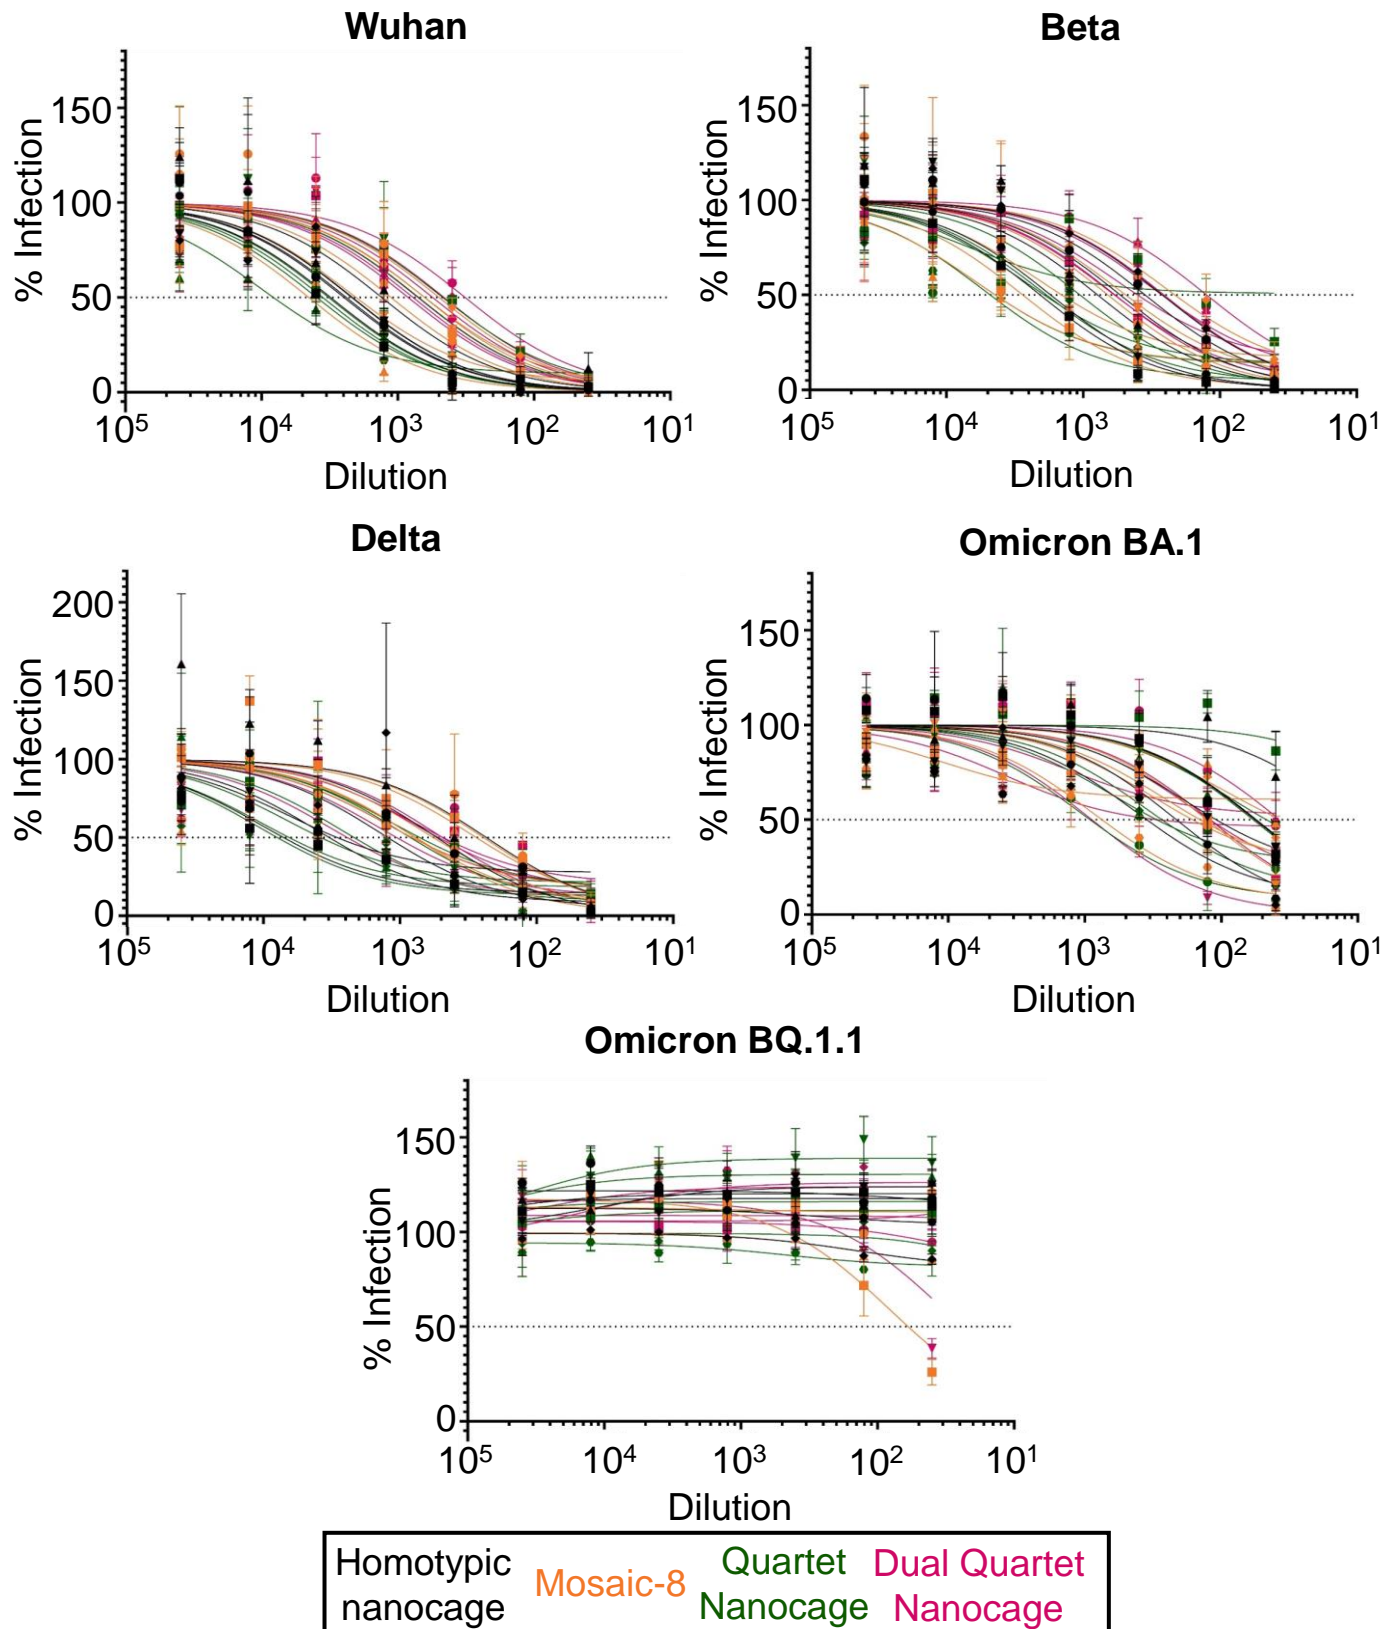

**Supplementary Fig. 16. Authentic virus dose response curves.** Neutralization of the Wuhan, Beta, Delta, Omicron BA.1, and Omicron BQ.1.1 SARS2 variants by antisera raised through immunizations with 0.2 nmol antigen. The percent of infection relative to a no-sera control (% Infection) was plotted relative to the dilution of sera. Each point is the mean of four replicates with error bars  $\pm 1$  s.d. and each curve is the response measured for a single animal ( $n = 6$ ). These curves were used to determine the ID<sub>50</sub> values plotted in Supplementary Fig. 15B. ID<sub>50</sub> could not be calculated for Omicron BQ.1.1.

## A Sarbecovirus pseudovirus neutralizations

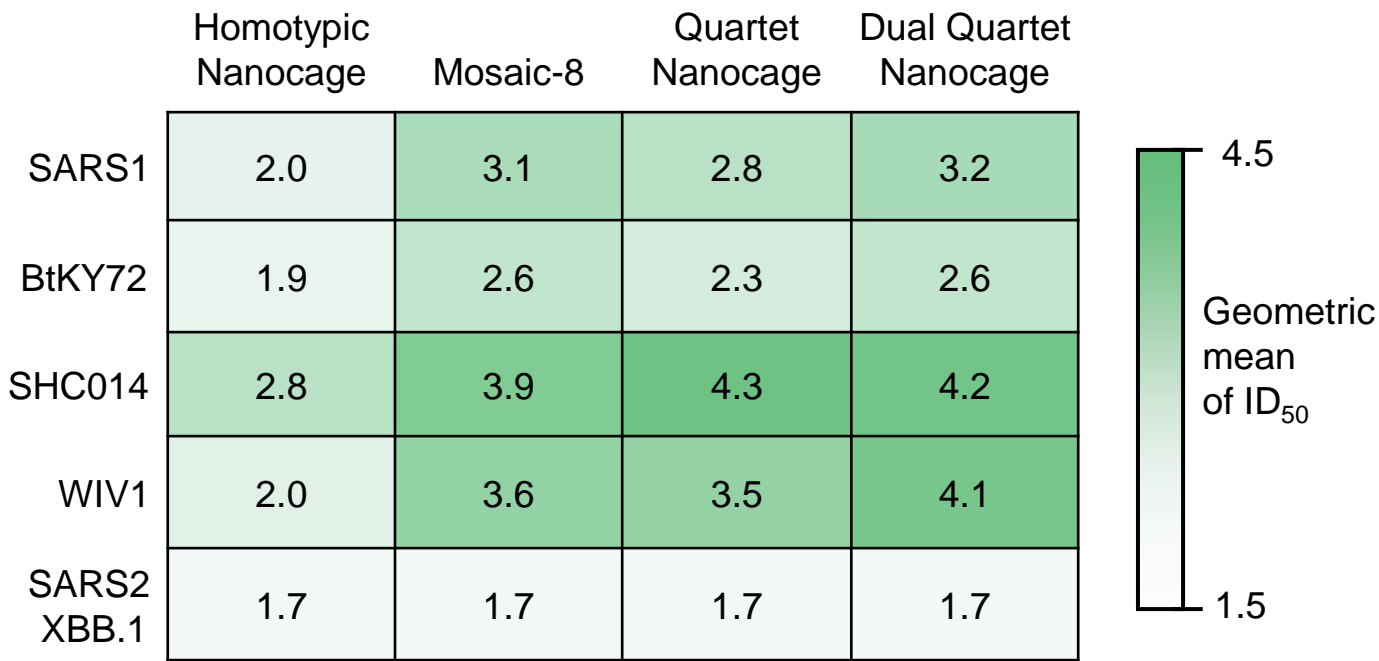

## B SARS2 VOC neutralizations

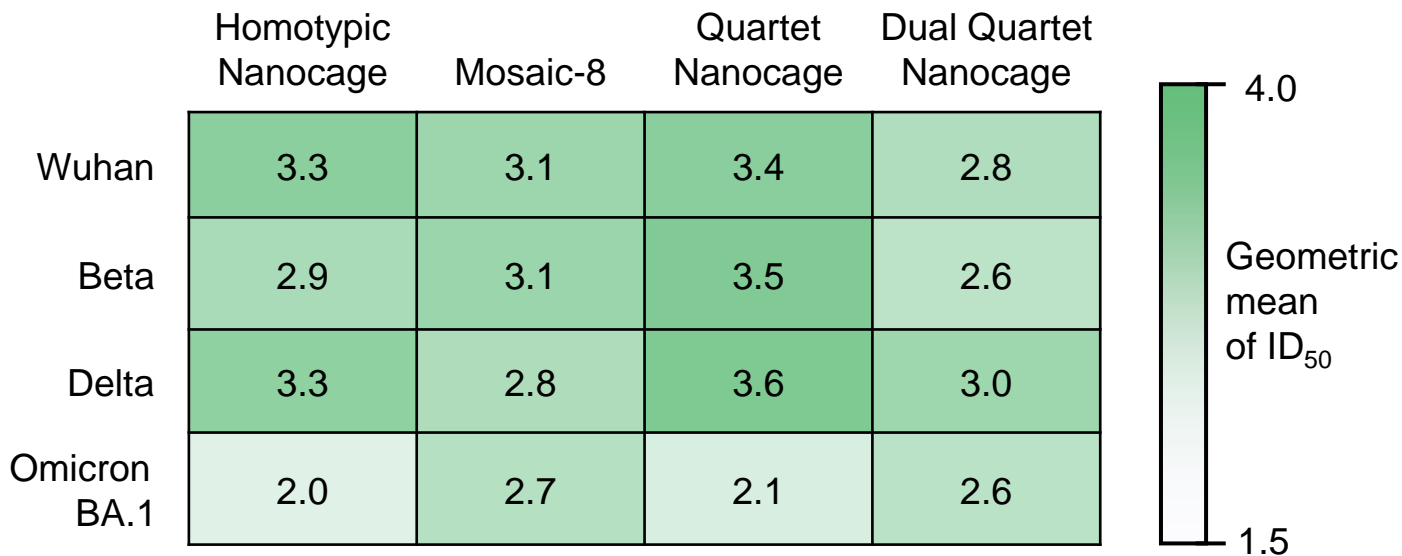

**Supplementary Fig. 17. Summary of high dose virus and pseudovirus neutralizations.** The geometric mean of ID<sub>50</sub> for viral neutralization (n=6) with high dose immunogens. **(A)** Heat map of pseudovirus neutralization by sera raised through immunizations with 0.2 nmol of the specific antigen, summarizing data presented in Supplementary Figure 14 and 15. **(B)** Heat map of SARS2 VOC neutralization by sera raised through immunizations with 0.2 nmol of the specific antigen, summarizing data presented in Supplementary Figure 15.

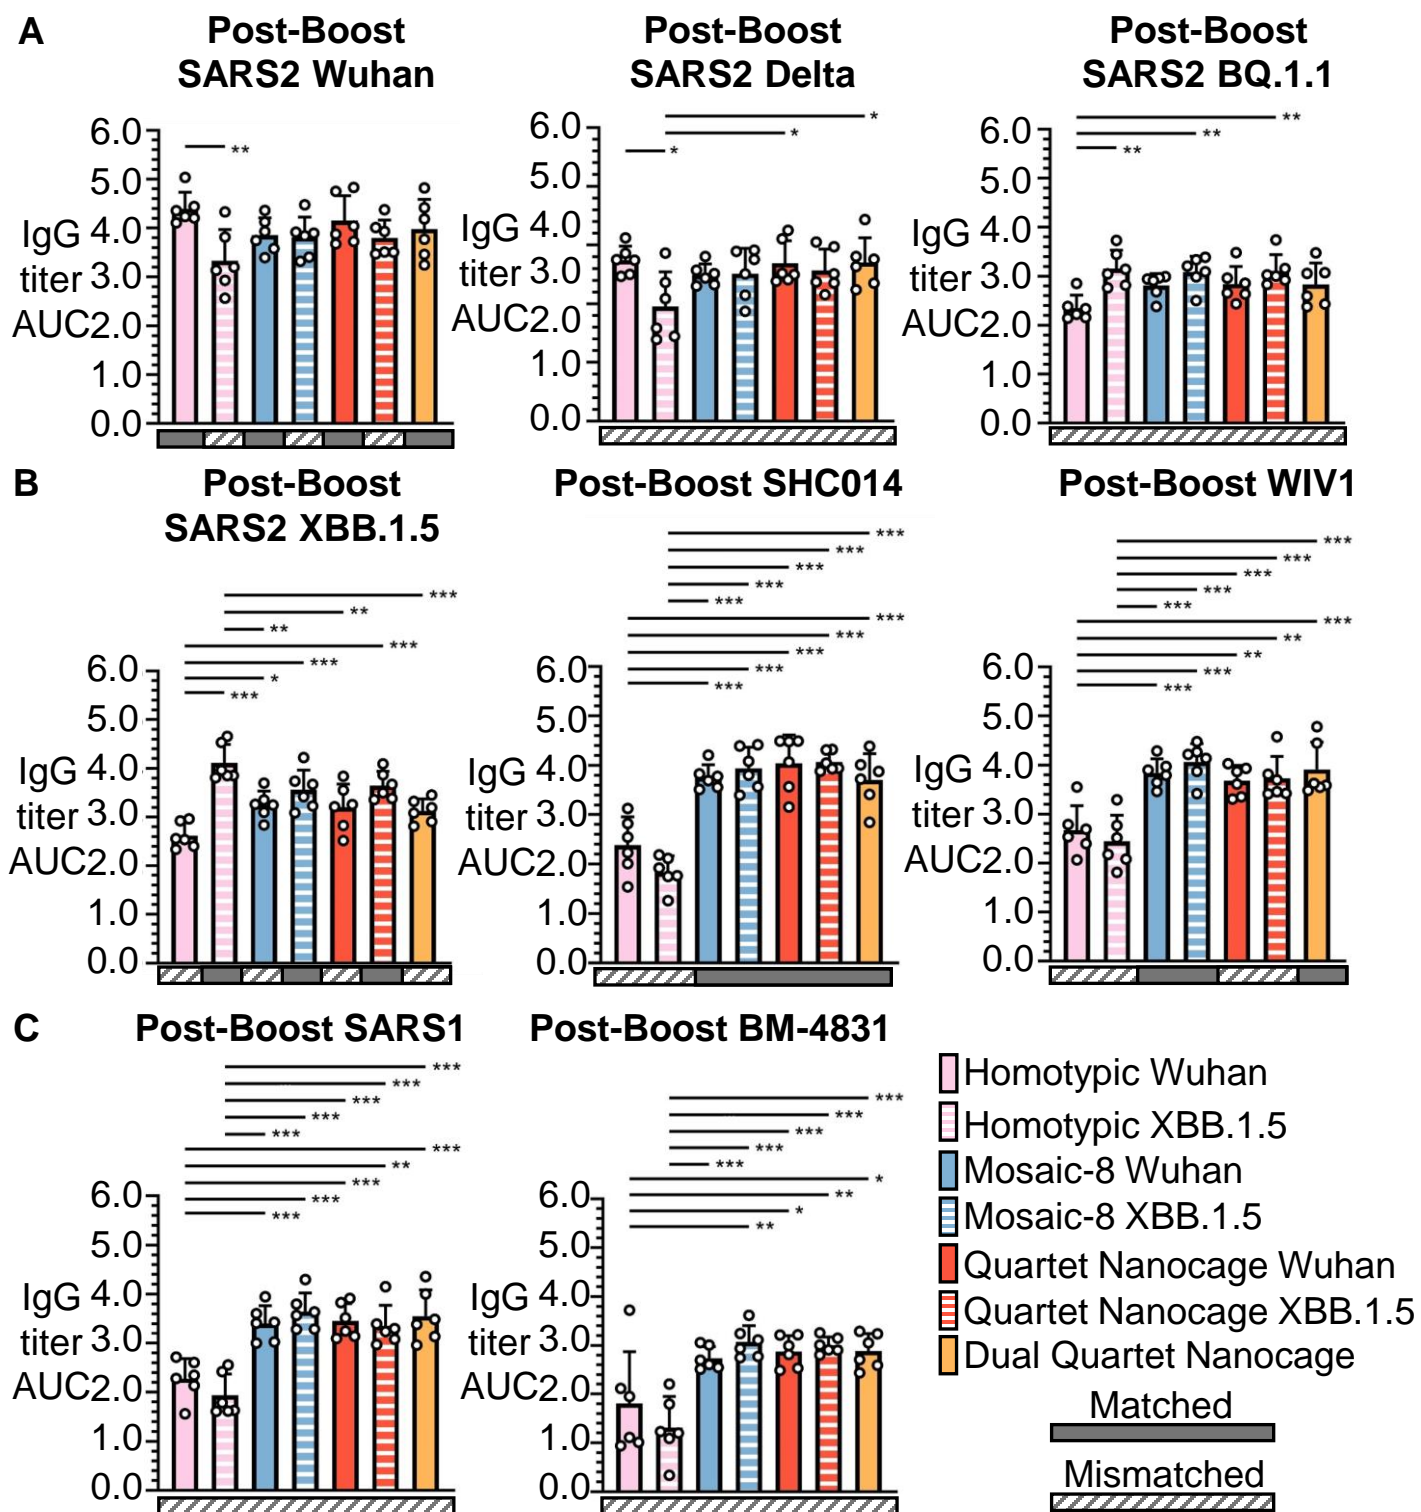

**Supplementary Fig. 18. ELISA binding for immunogens with Wuhan or Kraken RBD.**

ELISA for serum IgG from mice immunized with the indicated immunogen with 0.2 nmol antigen per dose. Quartet Nanocage Wuhan is based on SpyTag-Quartet. Quartet Nanocage XBB.1.5 is based on Kraken Quartet. Dual Quartet Nanocage is based on SpyTag-Quartet and Alternate Quartet. Each dot represents serum from one animal. Solid gray rectangles under samples indicate the ELISA is against a component of that vaccine (matched), while diagonally striped rectangles indicate the ELISA is against an antigen absent in that vaccine (mismatched). The mean is denoted by a bar, with error bars  $\pm 1$  s.d.,  $n = 6$ . Significance was calculated with an ANOVA test using Tukey's post hoc test. \*  $p < 0.05$ , \*\*  $p < 0.01$ , \*\*\*  $p < 0.001$ ; other comparisons were non-significant. Bars for immunogens containing SARS Wuhan are solid. Bars for immunogens containing SARS Omicron XBB.1.5 (Kraken) are striped. **(A)** Post-boost response to SARS2 Wuhan, SARS2 Delta, and SARS2 BQ.1.1. **(B)** Post-boost response to SARS2 XBB.1.5, SHC014 and WIV1. **(C)** Post-boost response to SARS1 and BM-4831.

## Post-Boost SARS2 D614G

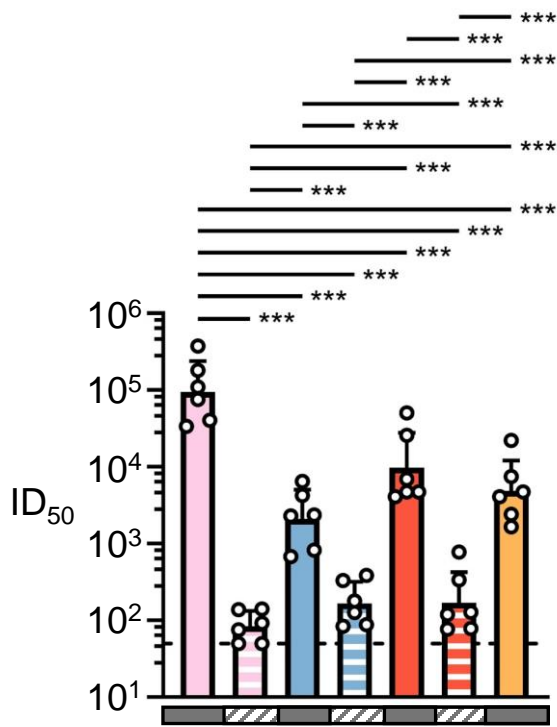

## Post-Boost SARS2 XBB.1.5

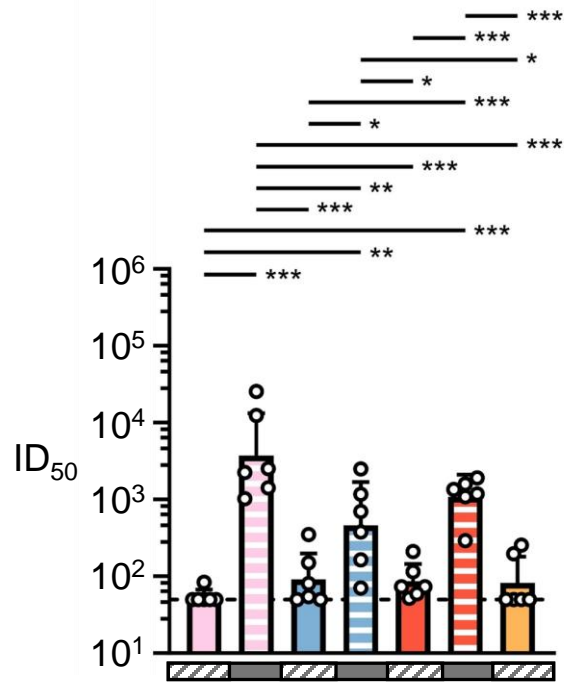

## Post-Boost SARS1

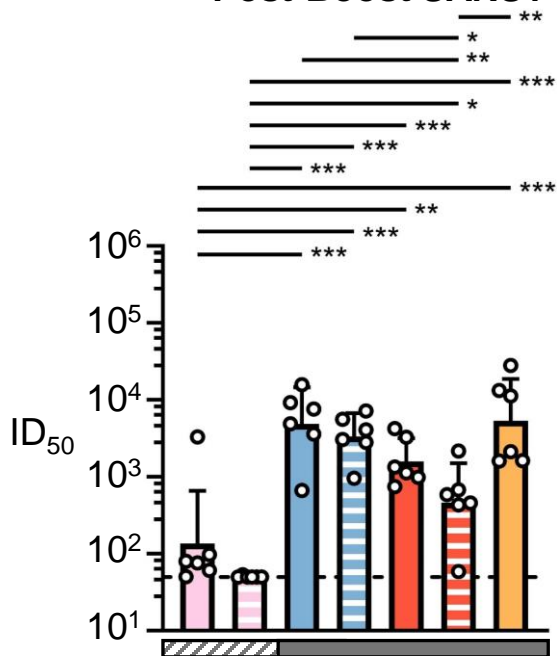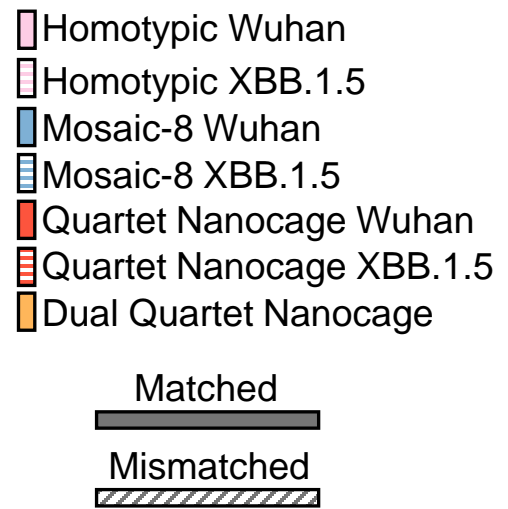

### Supplementary Fig. 19. Pseudovirus neutralization for Quartet and Mosaic immunogens with Kraken RBD.

Pseudovirus neutralization for serum IgG from mice immunized with the indicated immunogen with 0.2 nmol antigen per dose. Neutralization data are presented for SARS2 D614G (SARS2 Wuhan with a single point mutation), SARS2 XBB.1.5 and SARS1. Each dot represents serum from one animal. Solid gray rectangles under samples indicate the ELISA is against a component of that vaccine (matched), while diagonally striped rectangles indicate the ELISA is against an antigen absent in that vaccine (mismatched). The mean is denoted by a bar, with error bars + 1 s.d., with each dot representing the response for one animal (n = 6). Significance was calculated with an ANOVA test, followed by Tukey's multiple comparison post hoc test of ID<sub>50</sub> values converted to log<sub>10</sub> scale. \* p < 0.05, \*\* p < 0.01, \*\*\* p < 0.001; other comparisons were non-significant. Bars for immunogens that contain SARS Wuhan are solid. Bars for immunogens that contain SARS Omicron XBB.1.5 (Kraken) are striped. Dashed horizontal lines represent the limit of detection.

## A ELISA after Priming with Soluble SARS2 Spike

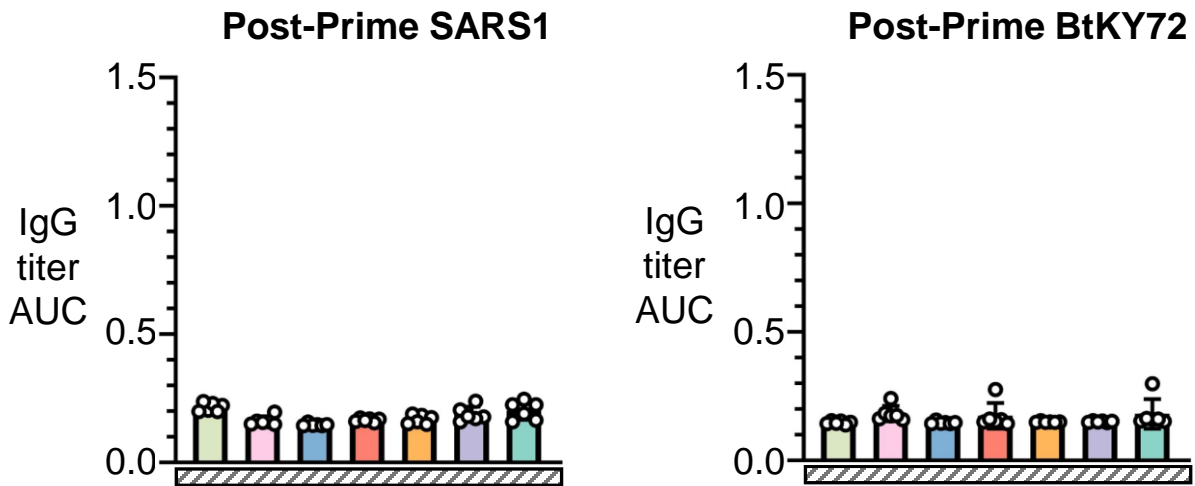

## B Post-Boost ELISA in Mice Pre-Primed for SARS2 Wuhan

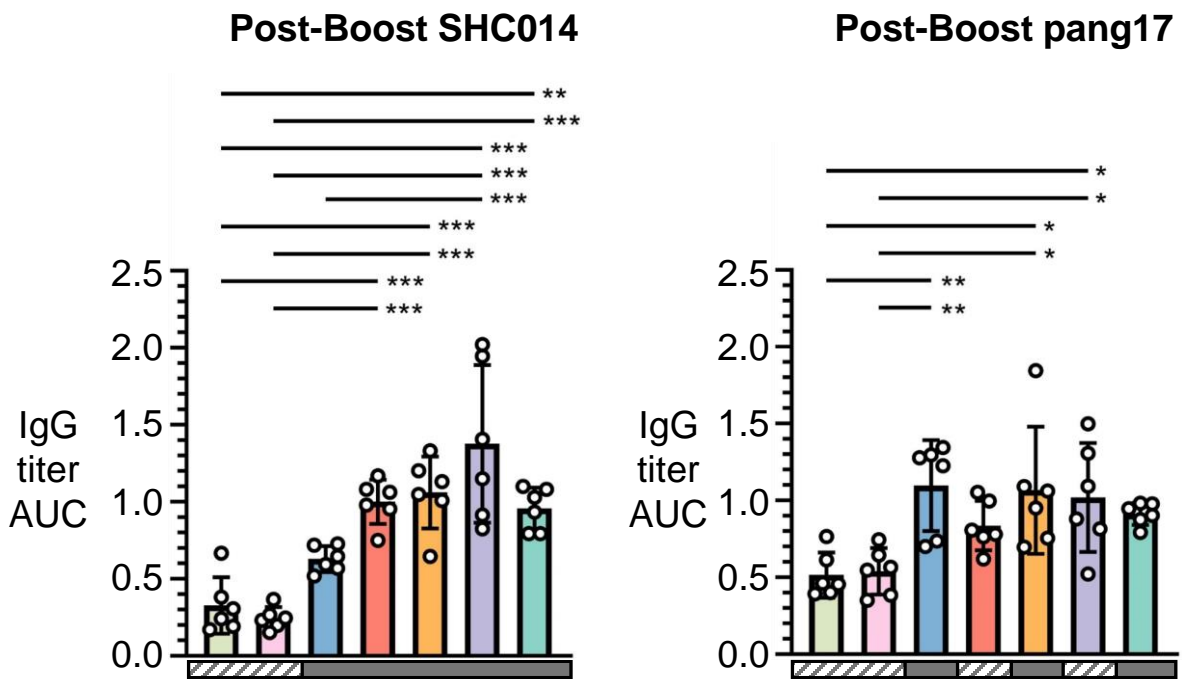

### Immunogens for boost:

|                    |                          |
|--------------------|--------------------------|
| SARS2 Wuhan Spike  | Dual Quartet Nanocage    |
| Homotypic Nanocage | Quartet Nanocage [SARS1] |
| Mosaic-8           | Dual Quartet             |
| Quartet Nanocage   | Nanocage [SARS1]         |

Matched

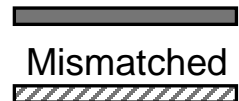

**Supplementary Fig. 20. Further demonstration that Quartet immunization induces broad antibodies even after SARS2 Spike priming.** (A) ELISA for serum IgG from mice immunized with a single dose of SARS2 Wuhan Spike protein, grouped by the second dose of 0.02 nmol antigen they will receive. No significance test was performed on post-prime samples. (B) ELISA for serum IgG, after mice immunized with a single dose of SARS2 Wuhan Spike protein were boosted with a variety of different antigens at 0.02 nmol per dose. Each dot represents serum from one animal. The mean is denoted by a bar, with error bars  $\pm 1$  s.d.,  $n = 6$ . Significance was calculated with an ANOVA test using Tukey's post hoc test. \*  $p < 0.05$ , \*\*  $p < 0.01$ , \*\*\*  $p < 0.001$ ; other comparisons were non-significant.

**A**

| Antibody | Class of RBD Epitope | Specificity |
|----------|----------------------|-------------|
| FI-3A    | 1                    | SARS2       |
| C121     | 2                    | SARS2       |
| FP-8A    | 1 or 2               | SARS2       |
| FD-5D    | 3                    | SARS2       |
| FP-12A   | 4                    | SARS2       |
| IY-2A    | 4                    | Broad       |
| EY-6A    | 4                    | Broad       |
| LCA60    | n/a                  | MERS        |

**B****Monoclonal antibody binding to immunogens**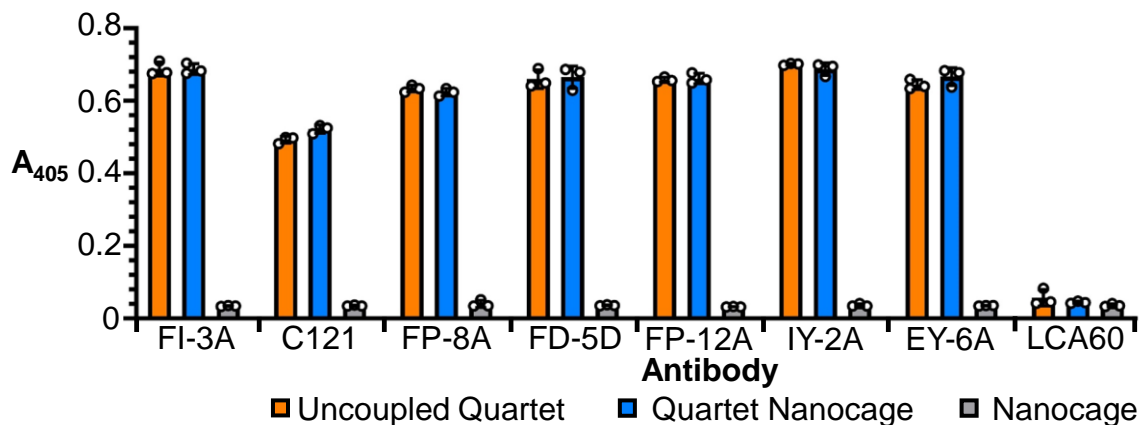**C Monoclonal antibody binding with different Quartet orientations**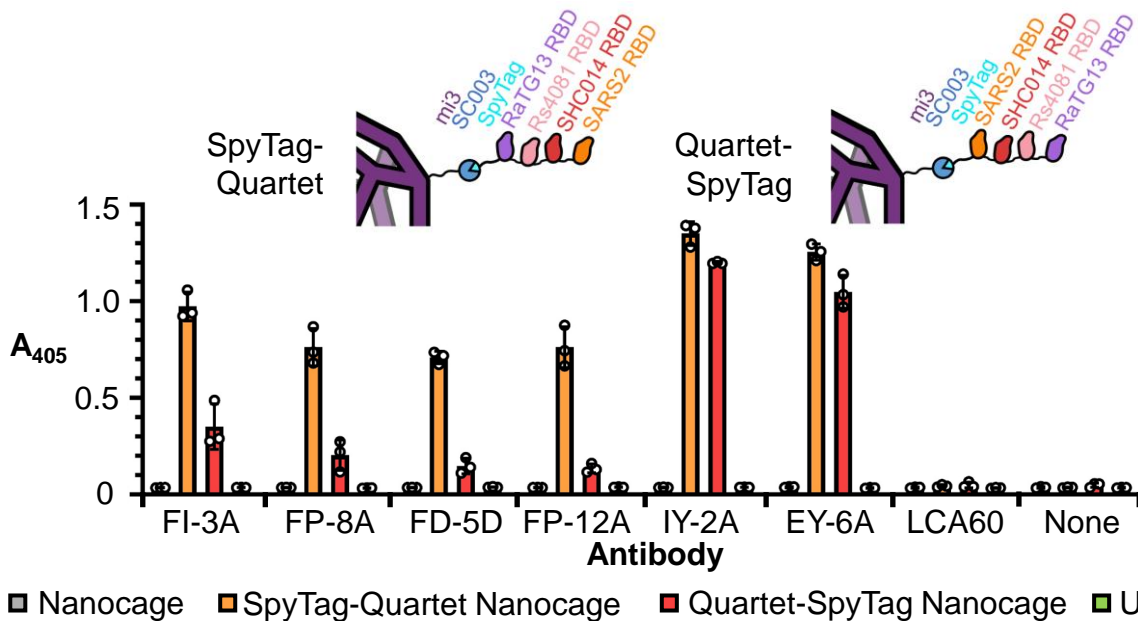**Supplementary Fig. 21. Monoclonal antibody binding to Quartet Nanocages. (A)**

Summary of monoclonal antibodies used in these experiments, with LCA60 as a negative control. **(B)** Comparison of monoclonal antibody binding to Quartet with and without coupling to SpyCatcher003-mi3. The mean absorbance for replicate wells ( $n=3$ ) is denoted by a bar, with error bars  $\pm 1$  s.d. **(C)** Comparison of monoclonal antibody binding to Quartet coupled to SpyCatcher003-mi3 with different orientations. The mean absorbance for replicate wells ( $n=3$ ) is denoted by a bar, with error bars  $\pm 1$  s.d.

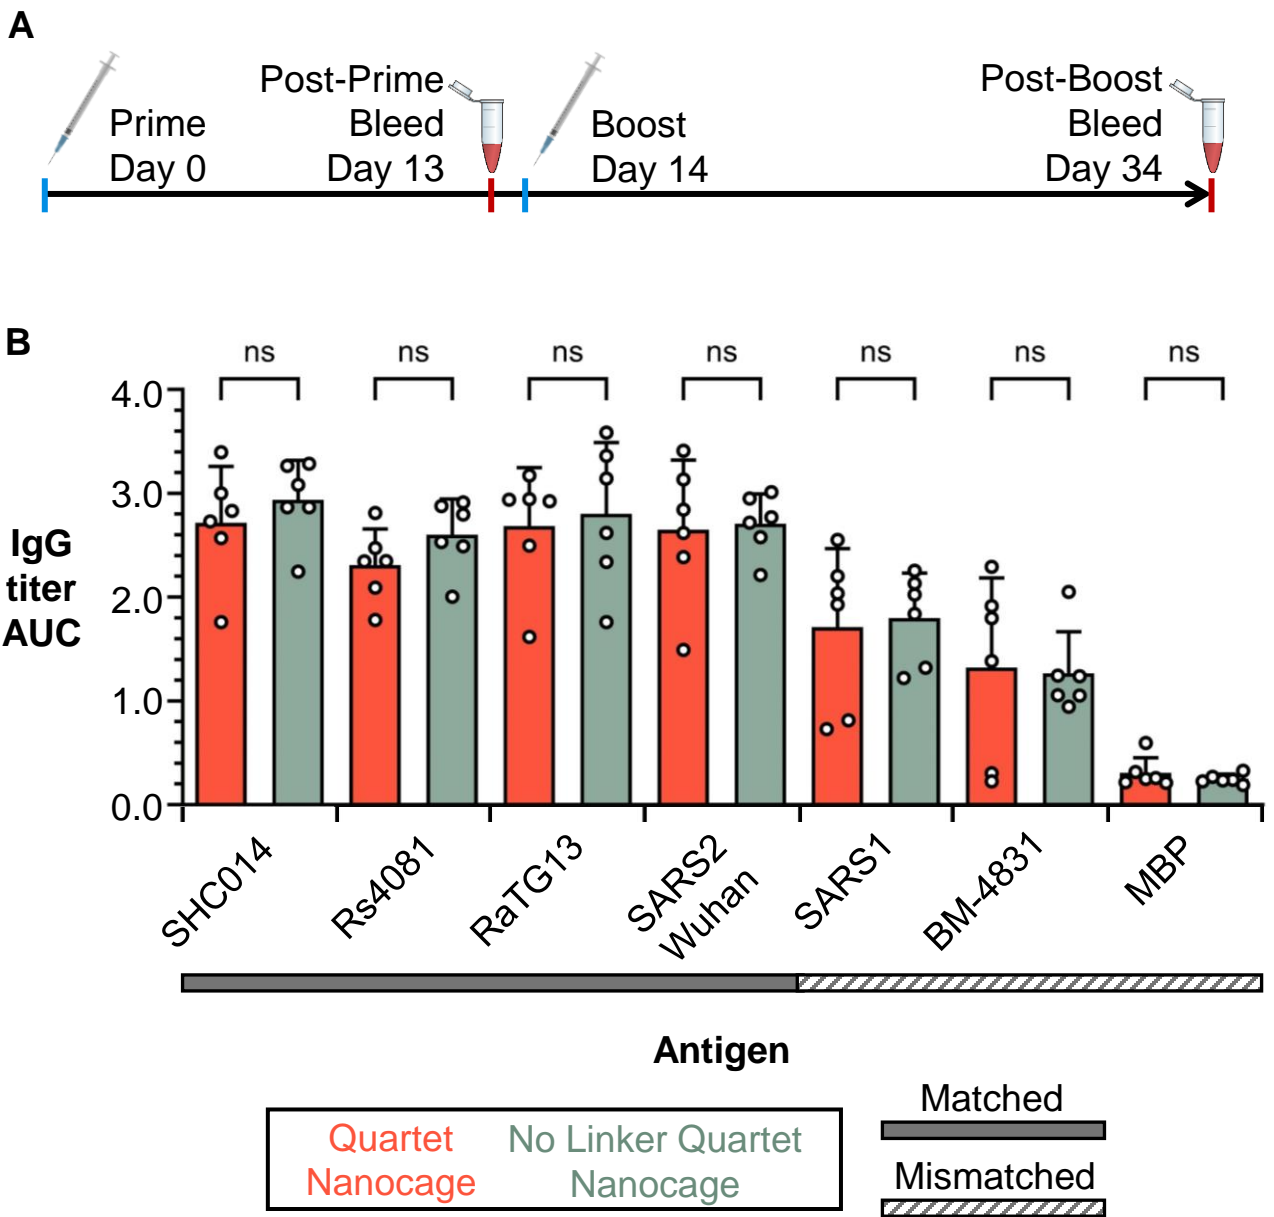

**Supplementary Fig. 22. Immunogenicity for Quartets with or without linkers.**

Immunizations were performed with 0.02 nmol Quartet Nanocages from the conventional Quartet with flexible linkers between each RBD or No Linker Quartets with no linkers between RBDs. (A) Timeline for immunizations. (B) ELISA for serum IgG antibodies presented as area under the curve of a serial dilution of sera. Sera samples are from mice immunized using a conventional Quartet Nanocage (red) or a No Linker Quartet Nanocage (gray). Each dot represents serum from one animal. The mean is denoted by a bar, with error bars + 1 s.d., n = 6. ns means non-significant. Statistical comparisons were only made between responses to each antigen with or without linkers. Significance was calculated with an ANOVA test using Tukey's post hoc test. Solid gray rectangles under samples indicate the ELISA is against a component of that vaccine (matched), while diagonally striped rectangles indicate the ELISA is against an antigen absent in that vaccine (mismatched).

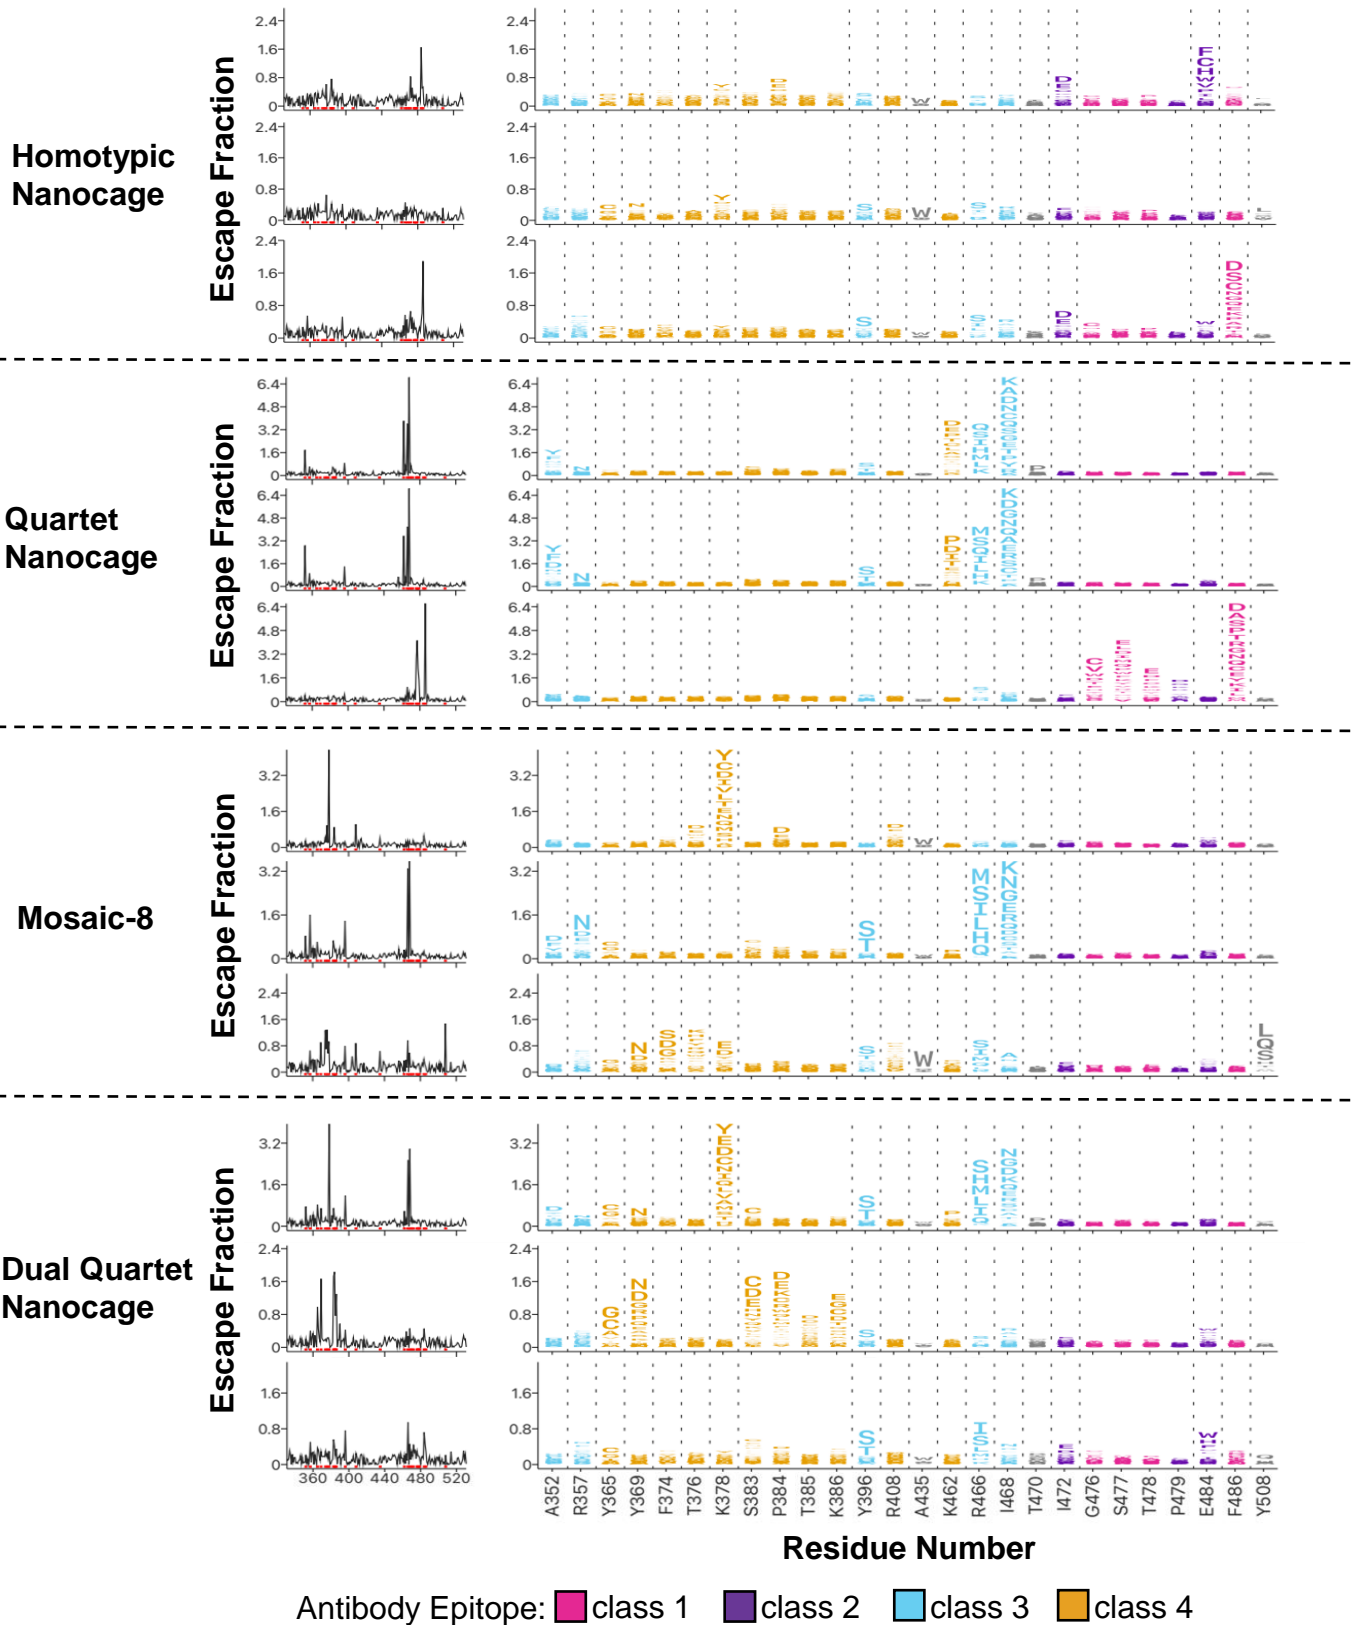

**Supplementary Fig. 23. Antibody-escape maps for sera from immunization with Quartet and Mosaic antigens.** Analysis by deep mutational scanning of sera of mice (n=3) primed and boosted with 0.2 nmol of each vaccine candidate. The line plots on the left visualize the sum of effects of all mutations at each RBD site on antibody binding; larger values indicate greater escape from antibody binding. Logo plots on the right show mutations that disrupt antibody binding. The height of each letter represents that mutation's escape fraction. Sites are colored by antibody epitope, while sites where some mutations introduce a potential N-linked glycosylation site sequon (NxS/T) are gray. The y-axis is scaled independently for each serum sample.



## Supplementary Discussion

We gained additional insight using 10-fold higher antigen dose and the squalene-based adjuvant AddaVax to further enhance viral neutralization (Supplementary Figure 14A). Under these conditions Mosaic-8, Quartet Nanocage, and Dual Quartet Nanocage immunogens all raised a greater antibody binding response to SARS1 and BtKY72 RBD than Homotypic Nanocage. However, unlike lower-dose immunizations, there was no significant difference between the antibody titer raised by these different Mosaic and Quartet immunogens for any of the RBDs tested (Supplementary Figure 14B). Mosaic-8, Quartet Nanocage, and Dual Quartet Nanocage all elicited favorable neutralization of WIV1, SARS1, and SHC014 pseudovirus that were stronger than Homotypic Nanocage (Supplementary Figure 14C, Supplementary Figure 15, Supplementary Figure 17). Under these high-dose conditions there was no clear pattern for neutralization of SARS2 Wuhan, Beta, Delta, and Omicron BA.1 by the different immunogens (Supplementary Figure 15B, Supplementary Figure 16, Supplementary Figure 17). Antibody responses in mice can easily be saturated in a way that is hard to achieve in human clinical studies, thus obscuring important differences between vaccine candidates (78, 79). Hence our low dose comparisons to Quartet Nanocages are likely to be most relevant for deciding on which candidates to take towards clinical development. No immunogen elicited substantial neutralization of SARS2 Omicron XBB.1 pseudovirus (Supplementary Figure 15A) or authentic Omicron BQ.1.1 virus using this immunization schedule (Supplementary Figure 16), which is consistent with the exceptional immune evasion found for Omicron variants (80).

## Supplementary Discussion References

78. H. L. Davis, Novel vaccines and adjuvant systems: the utility of animal models for predicting immunogenicity in humans. *Hum Vaccin* **4**, 246–250 (2008).
79. S. P. Graham et al. Evaluation of the immunogenicity of prime-boost vaccination with the replication-deficient viral vectored COVID-19 vaccine candidate ChAdOx1 nCoV-19. *npj Vaccines* **5**, 1–6 (2020).
80. R. Uraki et al. Humoral immune evasion of the omicron subvariants BQ.1.1 and XBB. *The Lancet Infectious Diseases* **23**, 30–32 (2023).
