# Supplementary material for: Proactive vaccination using multiviral Quartet Nanocages to elicit broad anti-coronavirus responses
Source: PubMed Central journal article supplement (PMC11329374; doi:10.1038/s41565-024-01655-9), 2024-05-06

## Source Data for 1d

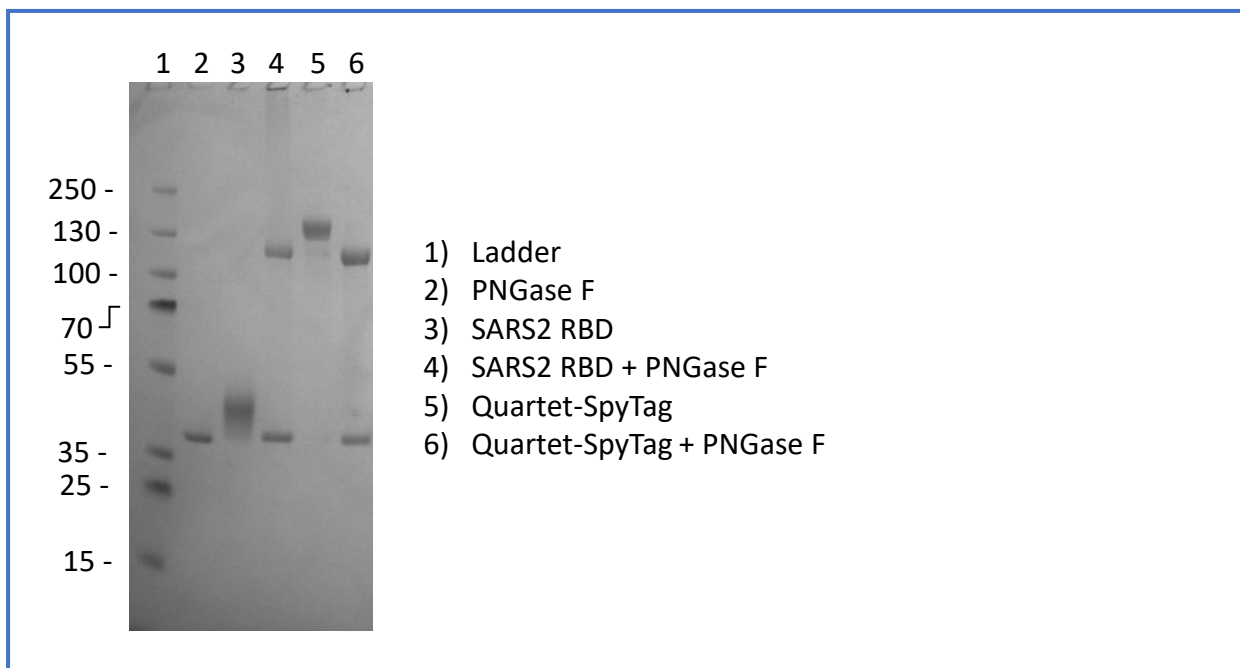

## Source Data for 1e

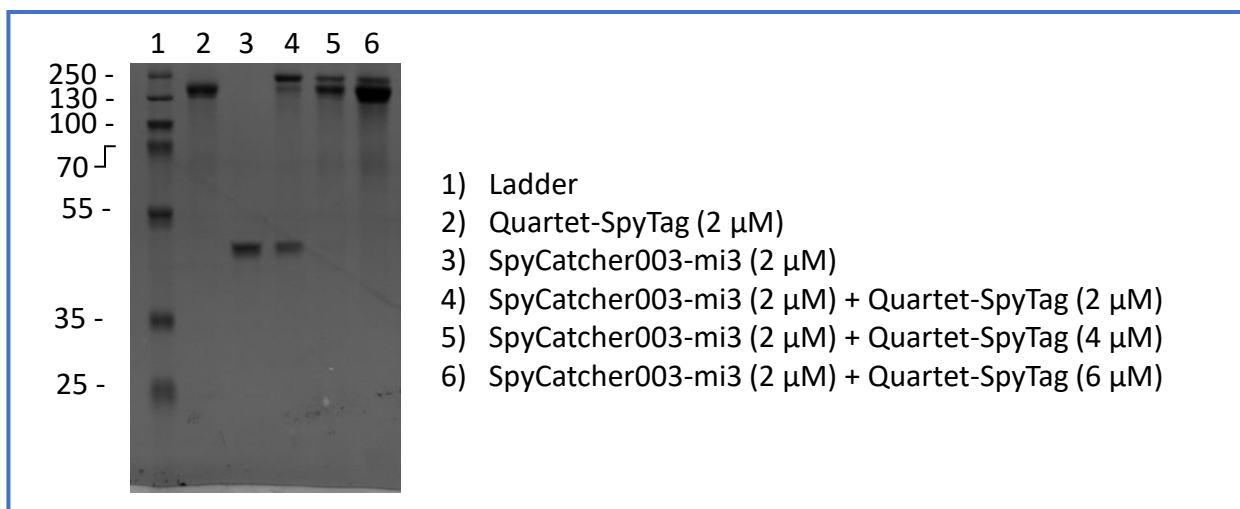

Supplement: 41565_2024_1655_MOESM5_ESM.pdf [file 41565_2024_1655_MOESM5_ESM.pdf]
